# 1 **A fungal pathogen that robustly manipulates the behavior of *Drosophila*** 2 ***melanogaster* in the laboratory**

3

4 Carolyn Elya<sup>1\*</sup>, Tin Ching Lok<sup>1#</sup>, Quinn E. Spencer<sup>1#</sup>, Hayley McCausland<sup>1</sup>, Ciera C. Martinez<sup>1</sup>, Michael  
5 B. Eisen<sup>1,2,3\*</sup>

6

7 <sup>1</sup> Department of Molecular and Cell Biology, University of California, Berkeley, CA

8 <sup>2</sup> Department of Integrative Biology, University of California, Berkeley, CA

9 <sup>3</sup> Howard Hughes Medical Institute, University of California, Berkeley, CA

10 \* Correspondence: [cnelya@gmail.com](mailto:cnelya@gmail.com), [mbeisen@berkeley.edu](mailto:mbeisen@berkeley.edu)

11 # These authors contributed equally to this publication

12

## 13 **Abstract**

14

15 Many microbes induce striking behavioral changes in their animal hosts, but how they achieve these effects  
16 is poorly understood, especially at the molecular level. This is due in large part to the lack of a robust system  
17 amenable to modern molecular manipulation. We recently discovered a strain of the behavior-manipulating  
18 fungal fly pathogen *Entomophthora muscae* infecting wild adult *Drosophila* in Northern California, and  
19 developed methods to reliably propagate the infection in lab.-reared *Drosophila melanogaster*. Our lab.-  
20 infected flies manifest the moribund behaviors characteristic of *E. muscae* infections: on their final day of  
21 life they climb to a high location, extend their proboscides and become affixed to the substrate, then finally  
22 raise their wings to strike a characteristic death pose that clears a path for spores that are forcibly ejected  
23 from their abdomen to land on and infect other flies. Using a combination of descriptive, histological,  
24 molecular and genomic techniques, we have carefully characterized the progress of infection in lab.-reared  
25 flies in both the fungus and host. Enticingly, we reveal that *E. muscae* invades the fly nervous system early  
26 in infection, suggesting a direct means by which the fungus could induce behavioral changes. Given the  
27 vast toolkit of molecular and neurobiological tools available for *D. melanogaster*, we believe this newly  
28 established *E. muscae* system will permit rapid progress in understanding how microbes manipulate animal  
29 behavior.

30

## 31 **Introduction**

32

33 Among the most extraordinary products of evolution are microorganisms that are able to manipulate animal  
34 behavior to their advantage. Some have achieved fame in the popular press, like the fungus *Ophiocordyceps*  
35 *unilateralis* that makes ants wander away from their nests and climb to an optimal height before sprouting  
36 through their heads to rain down infectious spores [1], or the protozoan *Toxoplasma gondii* that suppresses  
37 rodents' innate fear of cat odors to aid the return of the parasite to a cat's stomach where it can sexually  
38 reproduce [2]. However, the mechanisms by which these and other microbes hijack the animal nervous  
39 system have remained elusive.

40 *Entomophthora*, from the Greek meaning "insect destroyer", is an aptly-named genus within the basal  
41 fungal lineage Zoopagomycota consisting of species that infect, alter the behavior of, then kill their insect  
42 hosts [3]. *Entomophthora muscae*, first described in 1855 [4] in house flies (*Musca domestica*), is a fungal  
43 species complex that exclusively targets dipterans [5,6]. A fly infected with *E. muscae* exhibits a striking  
44 set of behaviors: shortly before sunset on its final day of life, the fly climbs to a high location (a behavior  
45 known as "summitting"), extends its proboscis and becomes affixed to the substrate on which it stands via  
46 fungal holdfasts [7–9]. The fly's wings then lift up and away from its dorsal abdomen, striking a final death  
47 pose that is thought to be ideal for fungal dispersal [9].

48 Over the course of the next few hours, the fungus within the dead fly differentiates into structures called  
49 conidiophores that emerge through the weakest points in the fly's cuticle, usually the intersegmental  
50 membranes of the dorsal abdomen, giving the cadavers a distinct banding pattern [10]. A primary conidium  
51 (also referred to as a "spore") forms at the tip of each conidiophore; once mature, these conidia are forcibly  
52 ejected into the surrounding environment in order to land on the cuticle of a susceptible fly host [11,12].

53 Launched primary conidia are polynucleated, campanulate (bell-shaped) and are surrounded by a sticky  
54 "halo" that serves to adhere the conidium where it lands. If successful in landing on the cuticle of a new  
55 host, the conidium germinates, using both mechanical and enzymatic force to bore through the cuticle and  
56 into the fly's hemolymph [10,13]. If the primary conidium misses its target or fails to germinate upon  
57 landing on the host [14], it can sporulate anew to generate a smaller secondary conidium [11]. Off-target  
58 conidia can continue to re-sporulate and give rise to smaller, higher order conidia until a host is reached or  
59 resources are exhausted [11]. Once inside the fly, the fungus is initially sustained by nutrients in the  
60 hemolymph then later consumes the fat body as an energy source [10]. When available resources are  
61 depleted, the fungus elicits the end of life behaviors and the fungal life cycle begins again.

62 A range of fly species and even non-dipterans can be infected and killed by *E. muscae* in the laboratory,  
63 though not all infected hosts manifest the stereotypical end-of-life behaviors, and susceptibility has not  
64 been found to track with host phylogeny [15,16]. *E. muscae* has almost exclusively been observed and  
65 studied in muscoid flies (especially the house fly, *Musca domestica*), organisms for which we have very  
66 few experimental tools [17]. Thus, despite inspiring curiosity and intrigue for over a century, how *E. muscae*

67 achieves control of its host remains poorly understood, with essentially no information as to what is  
68 occurring at the molecular level in either fungus or host.

69 In 2015, we observed several wild *Drosophila* in separate sites in Northern California with the  
70 characteristic death pose and fungal banding of *E. muscae* infections, and saw an unprecedented opportunity  
71 to study a behavior-changing fungus in the laboratory species, *Drosophila melanogaster*. Here, we describe  
72 the isolation and subsequent characterization of this *E. muscae* strain and its impact on *D. melanogaster*  
73 behavior in the laboratory, and present the *E. muscae*-*D. melanogaster* as a model for developing a  
74 mechanistic understanding of parasitic manipulation of host behavior.

75

## 76 **Results**

77

### 78 Discovery and isolation of *E. muscae* from wild *Drosophila*

79 In June 2015, we established a stable food source (organic fruits in a clean dish pan, referred to henceforth  
80 as the “fendel”) at a field site in Berkeley, CA to collect wild *Drosophila* for a separate study (see [18]). In  
81 late July 2015, we noticed that several flies had died with raised wings at the bottom of the fendel and, upon  
82 closer inspection, observed remnants of fungal growth and sporulation on these dead flies (Fig S1A). We  
83 suspected that these animals had been killed by the fungal pathogen *Entomophthora muscae*, though there  
84 have been only a few reports of *E. muscae* infection in wild *Drosophila* [19–21].

85 We first confirmed that these flies had been killed by *E. muscae* by genotyping a dozen representative  
86 cadavers at the ITS and 28S (LSU) rDNA loci and searching for similar sequences with BLAST (Fig  
87 S1B,C). PCR genotyping of the host at the cytochrome oxidase II (COII) locus [22] demonstrated that  
88 susceptible host species included *D. melanogaster*, *D. immigrans*, *D. simulans* and *D. hydei*, which are all  
89 commonly observed in Berkeley, CA. The fungal sequences for all of the typed cadavers were identical at  
90 these two loci, consistent with one *E. muscae* strain being responsible for this epizootic event. Species  
91 identification within the *E. muscae* species complex (which will hereafter be referred to as *E. muscae*) has  
92 historically relied on conidial morphology (and, to a lesser extent, host species), but is expanding to include  
93 molecular data [23]. Still, the taxonomic boundaries between strains and species within this group are still  
94 unclear. To distinguish our strain (or possibly species) from others reported, we will henceforth refer to our  
95 isolate as *E. muscae Berkeley*.

96 We were intrigued by the possibility that the presence of *E. muscae* in *Drosophila* would allow us to  
97 establish an infection in lab.-reared flies. However, our initial observations were all of dead flies that had  
98 already ejected their spores (Fig S1A). Studies in *M. domestica* have shown that, at room temperature, the  
99 majority of *E. muscae*’s infectious spores are ejected within the first approximately twelve hours of an

100 infected host's death, and lose infectivity within 48 hours of landing on a non-host substrate [24]. Thus, to  
101 culture *E. muscae Berkeley* we needed to procure freshly-killed flies to ensure access to viable conidia.

102 The repeated observation of *E. muscae Berkeley*-killed *Drosophila* demonstrated that the infection was  
103 circulating in the population of flies at our field site. We therefore reasoned that some of the flies that were  
104 visiting our fendel should be infected. Previous *E. muscae* research had demonstrated that the fungus only  
105 kills hosts once a day, around sunset [9]. Thus, we collected flies once every morning (1-2 hours after  
106 sunrise) from the fendel and monitored them nightly (1-3 hours after sunset), looking for animals that had  
107 recently died in the stereotyped death pose.

108 Using a single, wild cadaver, we first established a culture of *E. muscae Berkeley in vitro*, by  
109 inoculating liquid media previously reported to support *E. muscae* growth [23]. Genotyping the resultant  
110 culture at both the ITS and 28S loci verified that we had isolated the same strain as the one that had killed  
111 the previously observed cadavers (Fig S2).

112 To establish an *in vivo* infection, wild cadavers were co-housed overnight in a confined space with  
113 healthy, lab.-reared CantonS *D. melanogaster*, and exposed flies were monitored nightly for two weeks to  
114 identify *E. muscae Berkeley* cadavers. We repeated this process daily for several weeks before we were  
115 able to passage the infection. We were aware that our standard fly diet contained a small amount of the  
116 preservative tegosept (0.09%), but did not anticipate that this would be problematic since infected wild flies  
117 still died of infection after being housed on this diet for up to eight days (Fig S3). However, it was only  
118 when we began housing flies on food devoid of the preservative tegosept that we were able to successfully  
119 passage the infection.

120 Once we had transferred *E. muscae Berkeley* to lab.-reared flies, we assessed the impacts of several  
121 variables on infection efficacy, ultimately arriving at an optimized propagation protocol (Fig S4). Briefly,  
122 we expose flies to *E. muscae* by embedding six freshly-killed, infected cadavers headfirst in sucrose agar  
123 and confining 50 young (eclosed within the past 24 hours) CantonS adults of mixed sex with these cadavers  
124 for 24 hours in a cool, humid environment on an inverted 12:12 light:dark cycle. After 24 hours,  
125 confinement is relieved and flies are transferred to a medium free of tegosept. Exposed flies are housed at  
126 room temperature with moderate humidity and monitored daily for death by fungus.

127

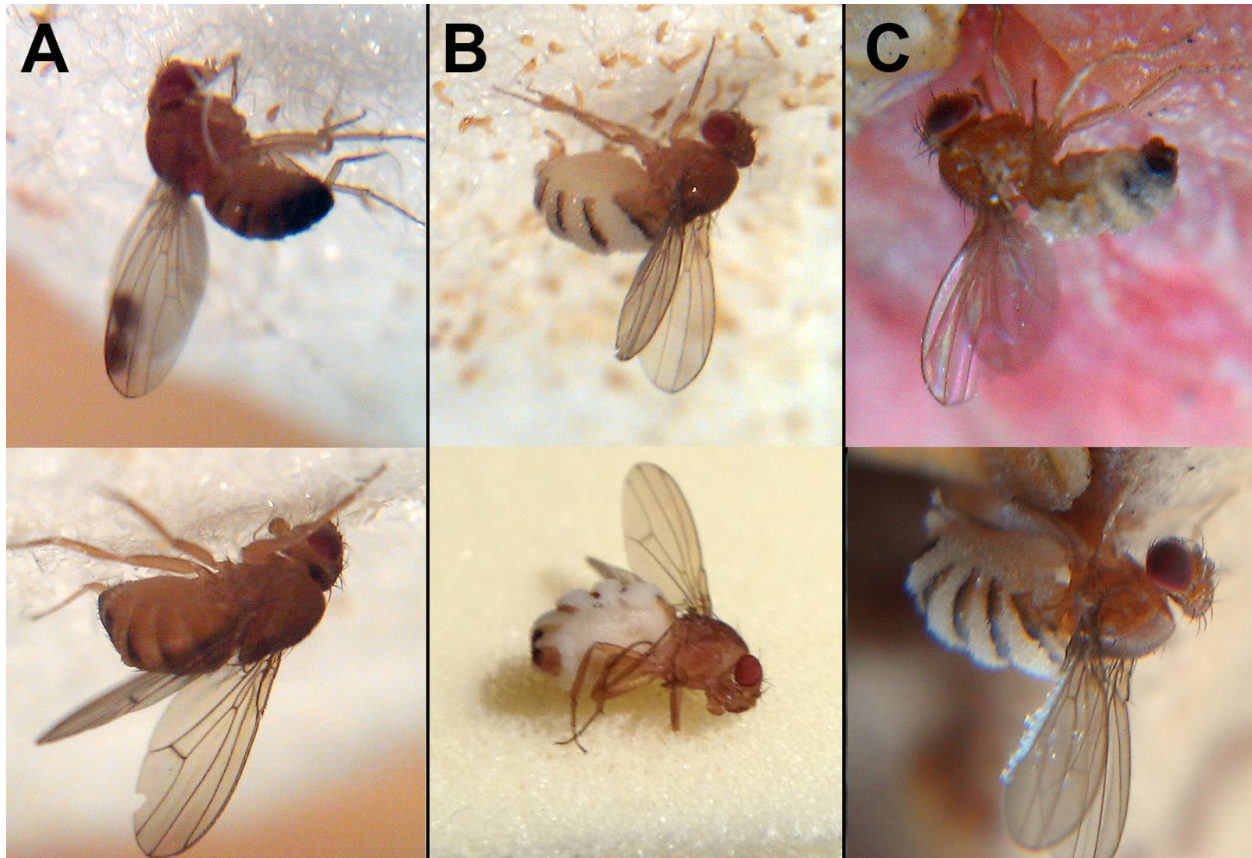

128

129 **Figure 1. Wild drosophilids killed by *Entomophthora muscae* Berkeley.** A) Cadavers found among  
130 sampled flies 65 minutes (above) and 40 minutes (below) after sunset. *E. muscae* Berkeley has not grown  
131 through the host cuticle. B) Cadavers found among sampled flies 120 minutes (above) and 160 minutes  
132 (below) after sunset. *E. muscae* Berkeley has grown through the host cuticle and will soon start to eject  
133 conidia. C) Cadavers as discovered *in situ* in fendel at least 12 hours after sunset. *E. muscae* Berkeley has  
134 grown through the host cuticle and ejected conidia, some of which have landed on the cadavers' wings.

135

#### 136 Description of *E. muscae* Berkeley infection in CantonS flies

137 With *E. muscae* Berkeley stably propagating *in vivo*, we next focused on carefully observing the process  
138 of infection in CantonS flies. By eye, infected flies are hard to distinguish from their healthy counterparts  
139 both morphologically and behaviorally until they begin to exhibit end-of-life behaviors (Fig 2A). Exposed  
140 flies bear melanized scars that form following spore entry through the cuticle, which are most apparent  
141 when the point of entry is the pale ventral abdomen. However, not all flies that are penetrated by the fungus  
142 are successfully infected and killed, as we have observed animals with scarring that survive beyond seven  
143 days after exposure, and have found that housing exposed flies on diet with anti-fungal significantly  
144 improves survival (Fig S4). At 72 hours after exposure and beyond, infected flies generally have more  
145 opaque abdomens than uninfected flies due to abundant fungal growth. Under our conditions, ~80% of

146 CantonS flies are killed four to seven days after exposure to *E. muscae Berkeley*, with the majority of deaths  
147 occurring at 96 and 120 hours (Fig 2B). While by eye infected animals behave normally until the onset of  
148 end-of-life behaviors, analysis of infected fly activity revealed that infected flies exhibit a marked decrease  
149 in total activity compared to healthy counterparts beginning about 36 hours before time of death, which  
150 presently is the best indication of imminent mortality for a given fly (Fig 2C).

151 On the last day of life, *E. muscae Berkeley* infected flies stop moving 0-5 hours before sunset (Fig 2D).  
152 Taking time of last movement as a proxy for time of death, this observation agrees with reports of *E. muscae*  
153 in house flies [9]. Also consistent with previous reports, flies exposed to *E. muscae Berkeley* and housed  
154 under complete darkness die sporadically throughout the day rather than in a gated fashion (Fig S5, [9]).  
155 As healthy flies housed for 168 hours in complete darkness maintain circadian rhythm, this suggests that  
156 environmental cues and/or a fungal clock are required to coordinate the timing of death, as has been  
157 previously suggested [9]. Of note, flies housed in complete darkness are still observed to die in elevated  
158 positions. This suggests that summiting behavior relies predominantly on gravitaxis rather than phototaxis.  
159

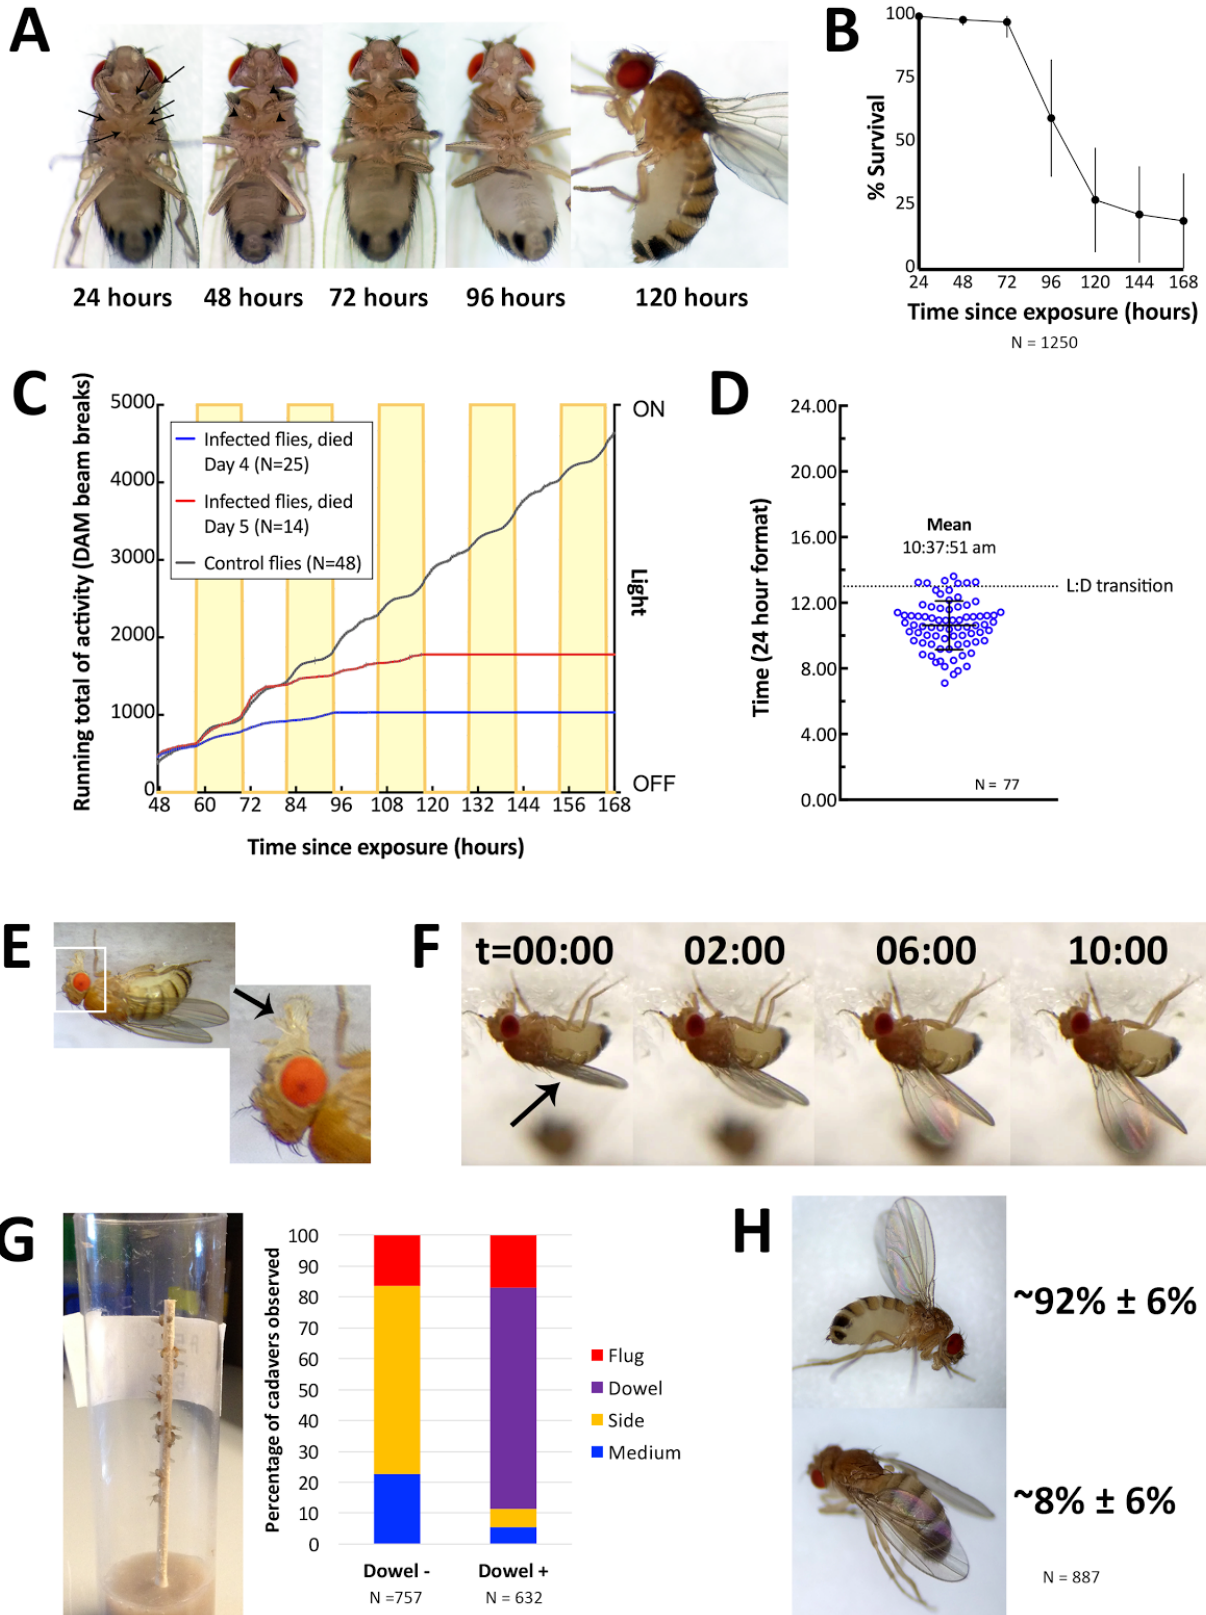

161 **Figure 2. Characteristics of *E. muscae Berkeley* infected CantonS.** A) Typical female fly over the course  
162 of infection. Arrows denote conidia that have landed on the cuticle but not yet bored into the hemolymph.  
163 Arrowheads indicate melanization of the fly cuticle that has occurred in response to conidia boring into  
164 hemolymph. B) Time of death for flies infected as per standardized protocol (Fig S4). C) Activity profile  
165 of control flies or *E. muscae Berkeley*-infected flies measured using the *Drosophila* activity monitor  
166 (DAM). D) Time of last movement as measured using the DAM. Each blue circle represents the time of  
167 last movement observed for one cadaver. Flies were exposed to *E. muscae Berkeley* as per standardized  
168 protocol. Dotted line indicates the light-dark transition (L:D transition). E) *E. muscae Berkeley*-infected fly  
169 exhibiting proboscis extension tens of minutes before death. Arrow indicates extended proboscis adhered  
170 to the surface. Real time footage of an *E. muscae Berkeley*-infected fly undergoing proboscis extension is  
171 available as Movie S1. F) *E. muscae Berkeley*-infected fly exhibiting wing raising immediately prior to  
172 death. Arrow indicates original positioning of wings. Time elapsed is given in minutes:seconds. Real time  
173 footage of an *E. muscae Berkeley*-infected fly undergoing wing raising is available as Movies S2, S3. G)  
174 *E. muscae Berkeley*-killed CantonS summited and adhered to a wooden dowel. Graph to the right indicates  
175 position of death for flies housed in vials without (Dowel -) or with (Dowel +) a wooden dowel. H) Most  
176 commonly observed wing positions of *E. muscae Berkeley*-killed CantonS. Complete wing raising is  
177 observed in most cadavers; wing lowering is consistently observed in a small fraction of cadavers.

178  
179 On the last day of life, flies infected with *E. muscae Berkeley* show a precipitous decline. The first  
180 portent of imminent death is that flies cease to fly. Though they can still walk and are responsive to  
181 perturbations (i.e. poking with a paintbrush or jostling their container), they will not take flight. After they  
182 have lost the ability (or desire) to fly, moribund flies will begin to exhibit a shaky and slowed gait which is  
183 usually coincident with an upward climbing or movement towards a vertical surface. Many flies reach  
184 elevated positions before they lose the ability (or desire) to continue moving (even when perturbed by the  
185 experimenter), but some succumb to immobility before they leave the ground. When provided a thin,  
186 wooden dowel as a summiting substrate, more flies are observed to die in elevated positions, mostly on the  
187 dowel itself (Fig 2G). Interestingly, we have noticed that when drips of medium are present on the side of  
188 a vial, flies that die on the side of the vial are preferentially found on these drips. It is unclear if this indicates  
189 a preference for the medium as a climbing substrate (versus the smooth plastic of a fly vial) or if the flies  
190 are attempting to eat until their very last.

191 Once the fly stops walking, it extends its proboscis until it makes contact with the surface on which  
192 it is standing (Fig 2E). The extension of the proboscis is shaky and can occur slowly relative to extension  
193 in response to a nutritive stimulus, and we have observed in multiple instances that the labella of infected  
194 flies do not spread as is typically observed when uninfected flies eat (see Movie S1). Typically, once the



195 proboscis has made contact with the surface, the fly may move its legs in what appears to be an apparent  
196 attempt to escape, but the material that emanates from the proboscis is sufficient to keep it anchored in  
197 place. After the proboscis has adhered, the fly then begins to raise its wings up and away from the dorsal  
198 abdomen (Fig 2F). This process has been observed to take on the order of ~10 minutes, with wing raising  
199 occurring in small bursts, reminiscent of the inflation of a balloon (see Movies S2 and S3). Curiously, a  
200 persistent minority of infected flies die with their wings lowered down onto their abdomen rather than with  
201 wings elevated (Fig 2H). By applying pressure to the thorax of these flies, the wings are observed to  
202 “toggle” into the upright position, suggesting that the same muscles are involved in raising and lowering.  
203 The fly may continue to twitch its legs and antenna for several minutes after the wings have reached their  
204 final position but will shortly cease moving.

205         After death, the fungus inside of the fly continues to differentiate into conidiophores, conidia-  
206 launching structures, that grow out into the environment through weak points in the fly’s cuticle. Over the  
207 course of several minutes, each conidiophore forms a single primary conidium (Movie S7) which, upon  
208 maturation, is forcibly ejected into the environment. Using time lapse imaging, we observe that conidia  
209 begin to launch approximately five hours after sunset and continue doing so for several hours at ambient  
210 temperature and humidity (Fig 3A). We observed that conidia form and launch asynchronously within a  
211 given cadaver, and not all conidiophores are guaranteed to launch what appear to be mature conidia. Using  
212 high speed videography, we were able to capture the motion of conidial ejection (Fig 3B), and determine  
213 that conidia leave the conidiophore at an initial velocity of ~21 miles per hour (~9.4 meters/second). These  
214 speeds are comparable to those observed in coprophilous fungi, which are among the fastest observed  
215 velocities of organisms relative to their size known in the natural world [25]. In addition, we obtained high  
216 speed footage of primary conidia landing (Fig 3C), which shows conclusively that conidia and halo land  
217 concurrently, an observation that supports the fungal canon mechanism of spore discharge [26].

218

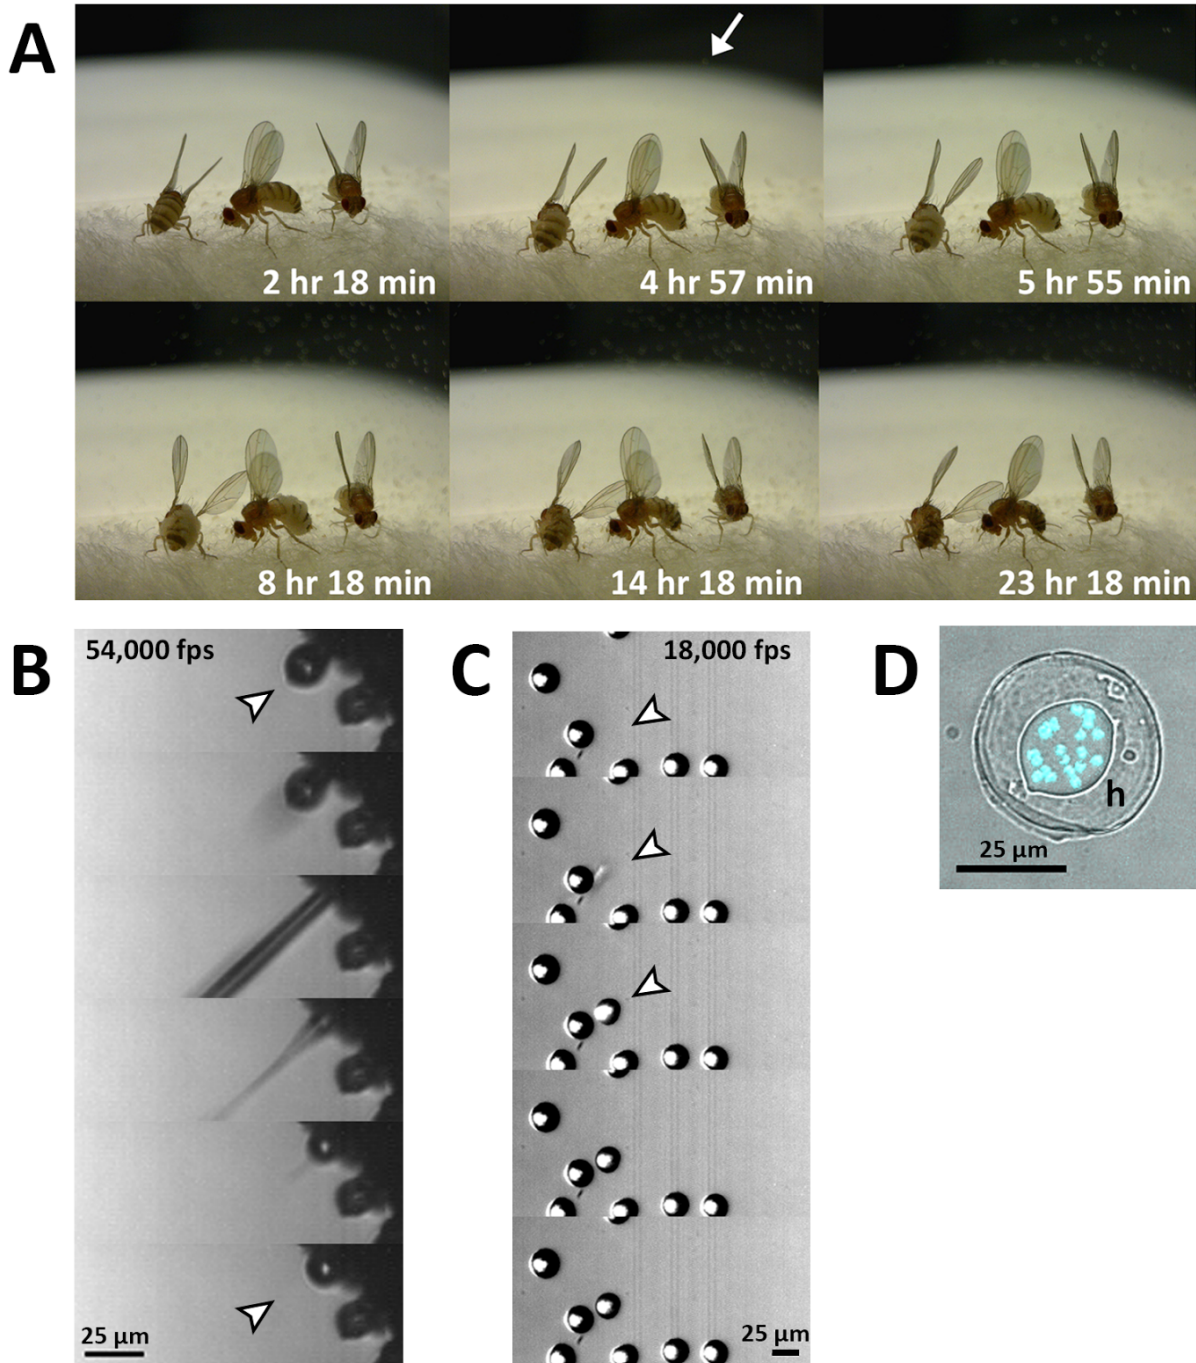

219

220 **Figure 3. Fungal transmission from *E. muscae* Berkeley killed cadavers.** A) Sporulation time lapse in  
221 *E. muscae* Berkeley killed cadavers. Time listed in each frame is the time that has elapsed since the light-  
222 dark transition. One image was taken every minute for ~24 hours with three cadavers situated on a cotton  
223 flug at ambient temperature and humidity. The arrow in the second frame indicates the first primary  
224 conidium observed to land on the camera's lens, indicating the start of conidial ejection (i.e. sporulation).  
225 Animated time lapse available as Movie S4. B) Time lapse of the ejection of a primary conidium from a

226 sporulating cadaver as captured at 54,000 frames per second (fps). Arrowheads indicates conidium that  
 227 launches and the vacant conidiophore that remains after launch. Animated time lapse available as Movie  
 228 S5. C) Time lapse of a primary conidium landing on the lid of a coverslip as captured at 18,000 fps. The  
 229 conidium lands as one complete unit, supporting the fungal cannon mechanism of primary conidium  
 230 ejection in *E. muscae*. Arrowheads indicates the position where the primary conidium lands. Animated time  
 231 lapse available as Movie S6. D) Primary conidium adhered to glass coverslip and stained with fluorescent  
 232 nuclear dye (Hoechst 33342). The conidium is surrounded by a halo of co-ejected material (h).

233

234 To compare *E. muscae Berkeley* with other reported isolates, we collected primary conidia and  
 235 measured their key morphological traits (e.g. Fig 3D). Our measurements are most similar to primary  
 236 conidia from *E. muscae sensu strictu* rather than other members of the *E. muscae* species complex (Table  
 237 1). As expected, secondary conidia were observed to form from primary conidia that had landed on non-  
 238 productive surfaces (host wing or agar substrate) (Movie S8).

239

240 **Table 1. Morphology of primary conidia of *E. muscae Berkeley* compared to other reported *E. muscae***  
 241 **strains.**

| Report                     | Isolated from          | Infected host          | # of nuclei       | Diameter of nuclei (µm) | Conidium length (µm)  | Conidium width (µm)   |
|----------------------------|------------------------|------------------------|-------------------|-------------------------|-----------------------|-----------------------|
| Present study <sup>1</sup> | <i>Drosophila spp.</i> | <i>D. melanogaster</i> | 13.9-14.9 (8-22)  | 3.7-4.1 (2.8-5.8)       | 23.5-26.1 (19.2-31.8) | 18.4-20.5 (14.6-26.7) |
| [21] <sup>2</sup>          | <i>Drosophila spp.</i> | <i>Drosophila spp.</i> | 15.3-15.9         | 4.4                     | 26.0-27.6 (23-30)     | 21.7-22.9 (17-27)     |
| [27] <sup>3</sup>          | <i>M. domestica</i>    | <i>D. suzukii</i>      | 12.8-13.8 (11-16) | NA                      | 27.9-29.1 (25.2-36.8) | 22.4-23.2 (19.7-27.6) |
| [28] <sup>4</sup>          | <i>M. domestica</i>    | <i>M. domestica</i>    | 15.2-20.2 (10-27) | 3.9-4.4 (3.5-5.5)       | 26.9-31.1 (21-35)     | 20.4-24.2 (16-29)     |

242 <sup>1</sup> Measurements are given as range in means of three series of 50 objects per host.

243 <sup>2</sup> Measurements given as reported, unknown number of conidia measured

244 <sup>3</sup> Measurements are given as reported, nuclei of 12 conidia from one animal were counted, 20 conidia were  
 245 measured for length and width

246 <sup>4</sup>Redescribed type species of *E. muscae* in type host, *M. domestica*, for reference. Measurements were taken  
247 of 8-27 series of 50 objects per host.

248

#### 249 Transcriptional profiles of *E. muscae Berkeley* and *D. melanogaster* over the course of infection

250 To gain a first comprehensive look into how *E. muscae Berkeley* infection progresses in *D.*  
251 *melanogaster* at the molecular level, we next measured how transcription changes in both host and fungus  
252 at 24 hour time points. We knew that in any given exposure vial there are a mix of infected and uninfected  
253 animals and faced the complication that, early on, infected flies are phenotypically indistinguishable from  
254 uninfected animals. However, we felt confident that we would be able to distinguish infected from  
255 uninfected exposed animals after sequencing mRNA since a) only a few *E. muscae Berkeley* reads would  
256 be needed to confirm that *E. muscae Berkeley* was present and b) it would be unlikely that infected and  
257 uninfected exposed animals would demonstrate identical transcriptional profiles. To favor our chances of  
258 collecting three infected flies for each time point, we collected six *E. muscae Berkeley* exposed CantonS  
259 females at each 24, 48 and 72 hours, three exposed flies at 96 hours, and six fresh cadavers, three at each  
260 96 hours and 120 hours. In parallel, we collected three CantonS females at each time point that were  
261 subjected to a “mock” exposure (housed under identical conditions but in the absence of cadavers). We  
262 prepared and sequenced mRNA libraries from each individual sampled, then aligned the reads to the *D.*  
263 *melanogaster* transcriptome reference and a bespoke *E. muscae Berkeley* transcriptome reference, which  
264 was assembled from reads that failed to align to the *D. melanogaster* reference. This initial *E. muscae*  
265 *Berkeley* transcriptome was contaminated by some fly RNAs. After removal of the bulk of contaminating  
266 transcripts based on BLAST alignment and expression levels, our final *E. muscae Berkeley* reference  
267 contained 86,509 transcripts, including a small number of contaminating *Drosophila* transcripts to which  
268 an average of 2.6% of reads from uninfected, control flies aligned (see Methods for details).

269 We first examined the percentage of reads that aligned to host or fungus in each of our time course  
270 samples (Figure 4A). We observe that *E. muscae Berkeley* reads are low abundance until 72 hours after  
271 exposure at which point a significant portion of the total reads align to the *E. muscae Berkeley*  
272 transcriptome. This likely reflects that the fungus does not begin to actively divide until between 48 and 72  
273 hours and is consistent with our previous observation that *E. muscae Berkeley* rRNA is not reliably  
274 detectable by endpoint reverse transcription PCR until at least 72 hours after exposure (Fig S6). Notably,  
275 the majority of reads from cadavers align to *E. muscae Berkeley* rather than fly. Strikingly, two of our  
276 cadavers show only trace amounts of *D. melanogaster* RNA at the point of sampling.

277

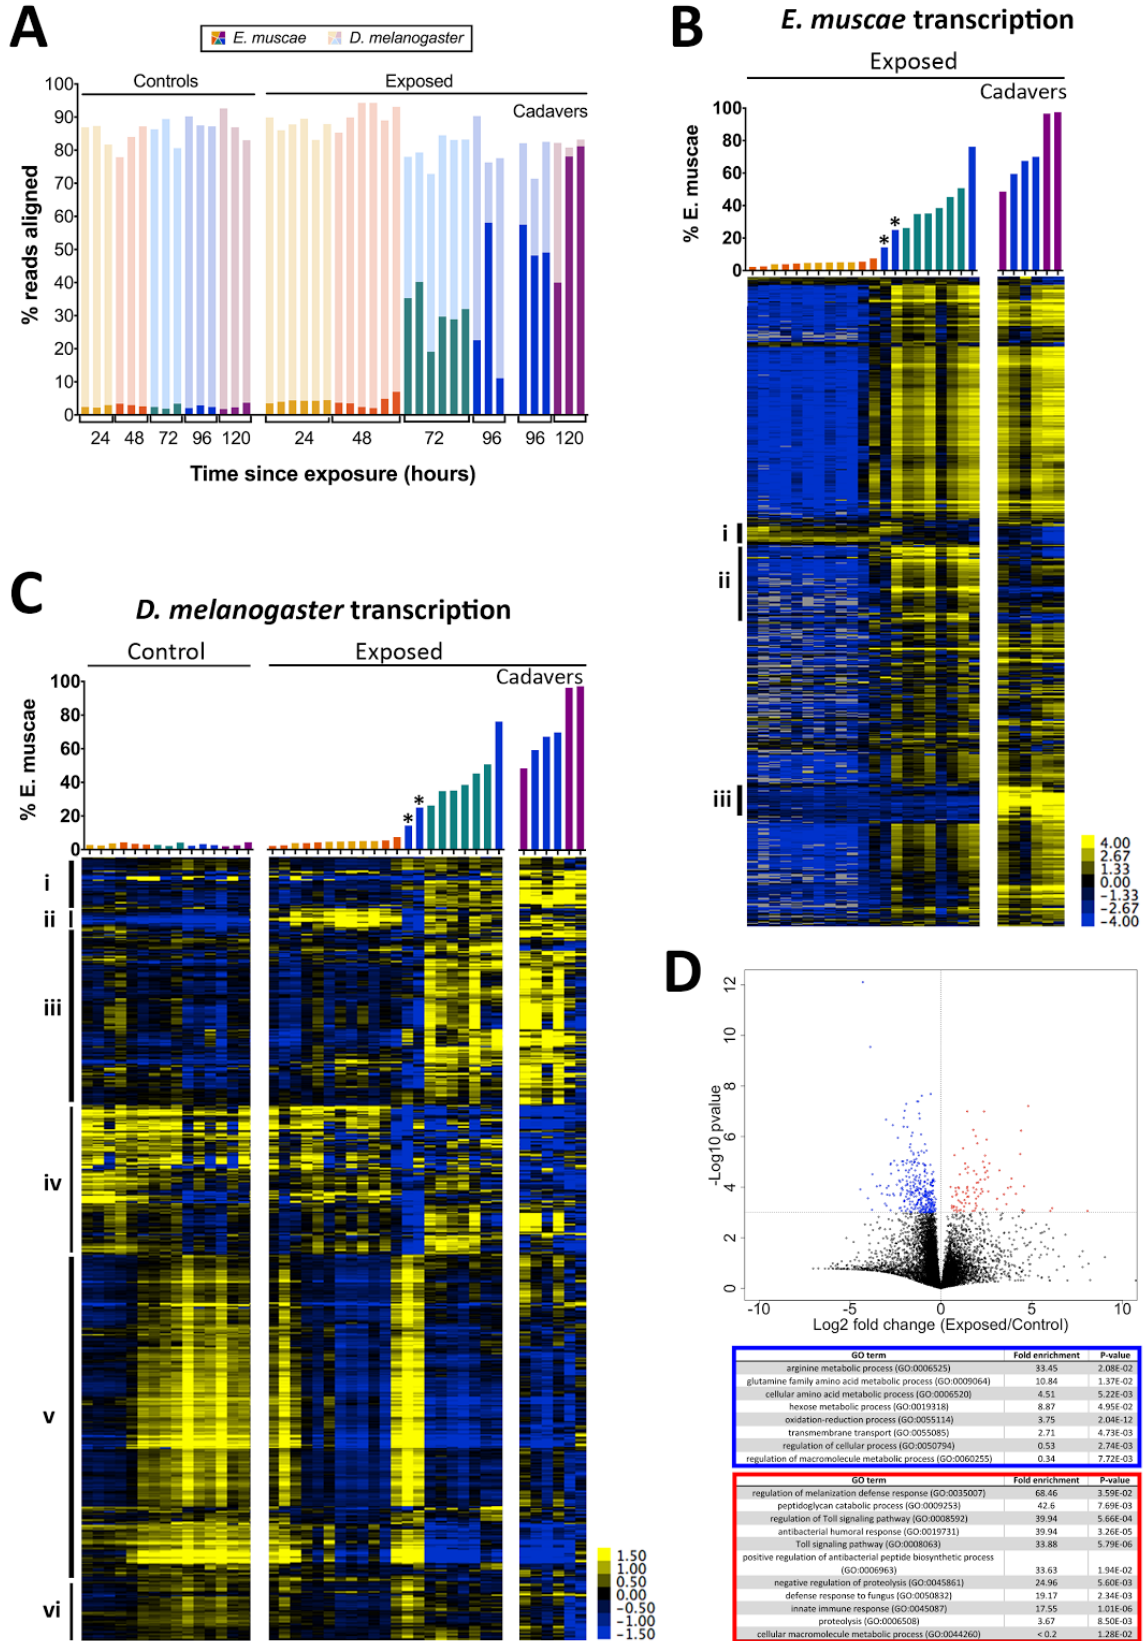

279 **Figure 4. Gene expression time course of *E. muscae Berkeley*-infected CantonS flies.** A) Percentage of  
280 reads aligned to *D. melanogaster* reference versus *E. muscae Berkeley* reference using Kallisto. Samples  
281 are separated into controls (healthy animals who were mock exposed), exposed (animals who exposed to  
282 *E. muscae Berkeley* and were alive at the time of sampling) and cadavers (animals who were killed by *E.*  
283 *muscae Berkeley*, dead at the time of sampling) and are color-coded according to the time point at which  
284 they were collected (i.e. 24, 48, 72, 96 or 120 hours). B) *E. muscae Berkeley* expression data from *E. muscae*  
285 *Berkeley*-exposed and cadaver samples. Complete linkage hierarchical gene clustering by gene was  
286 performed in Gene Cluster 3.0 after filtering out across all genes that are expressed at least at ten TPM in  
287 at least three out of 27 samples (10,809 transcripts total), then log transforming and centering on the mean  
288 value for each transcript. Samples are ordered by percentage of *E. muscae Berkeley* reads as a fraction of  
289 the total reads aligned (above). The scale bar for the heatmap is given to the right of the plot. Two 96 hour  
290 exposed samples that show an aberrant immune response compared to all other exposed samples are  
291 indicated by asterisks. C) *D. melanogaster* expression data from control, *E. muscae Berkeley*-exposed and  
292 *E. muscae Berkeley*-killed cadavers. Complete linkage hierarchical gene clustering by gene was performed  
293 in Gene Cluster 3.0 after filtering out across all genes that are expressed at least at two TPM in at least three  
294 out of 42 samples (10,875 transcripts total), then log transforming and centering on the mean value for each  
295 transcript. Samples are ordered by percentage of *E. muscae Berkeley* reads as a fraction of the total reads  
296 aligned (above). The scale bar for the heatmap is given to the right of the plot. Two 96 hour exposed samples  
297 that show an aberrant immune response compared to all other exposed samples are indicated by asterisks.  
298 D) Genes that are consistently over or under-expressed compared to controls over the first 72 hours after  
299 exposure to *E. muscae Berkeley*. Top: Volcano plot for all genes over the first 72 hours after exposure. P-  
300 value is determined by ANOVA grouping 24-72 hour control vs. 24-72 hour exposed samples. Genes with  
301 p-value below 0.001 are shown in color. Bottom: Panther GO-term analysis (complete biological process)  
302 of genes overexpressed (red) or under-expressed (blue) in exposed animals compared to controls.

303

304 We next surveyed gene expression in *E. muscae Berkeley* across our exposed samples. As different  
305 exposed individuals vary in their rate of infection by *E. muscae Berkeley*, we reasoned that it would be most  
306 informative to order our samples based on *E. muscae Berkeley* titer, which we approximated using the  
307 proportion of reads that aligned to *E. muscae Berkeley* of total reads aligned to either the *E. muscae Berkeley*  
308 or *D. melanogaster* references (Figure 4B). The bulk of transcripts are not expressed until three days after  
309 exposure, which could simply be a consequence of the fungus being low abundance until this time point.  
310 Interestingly, there are three groupings of genes (Groups i-iii) that demonstrate patterns that cannot be  
311 explained merely by fungal abundance in the samples. Group i consists of genes that are expressed early  
312 and depressed later on in infection, Group ii contains genes that turn on during the later phases of growth

313 in the living host but are turned off after the fly is killed and Group iii consists of genes that do not turn on  
314 until after the fungus has killed the host. At present, there is almost nothing known what gene products  
315 these transcripts encode, as there is little homology between entries in protein databases and the translated  
316 open reading frames in these transcripts.

317 Next, we examined host gene expression patterns across all of our samples, again ordering samples  
318 based on the proportion of *E. muscae Berkeley* aligned reads among all total and clustering genes by  
319 expression pattern (Figure 4C). Host gene expression segregates into six major groupings (Table S1). Group  
320 i and Group iii contain genes with low expression in controls and early infection, but increased expression  
321 as infection continues, and are enriched for genes involved in epithelial integrity and sensory processes,  
322 respectively. Group ii shows induction of expression all exposed samples except for two taken at 96 hours  
323 (asterisks) and is highly enriched for genes involved in the innate immune response to fungi. Group iv  
324 contains genes that, broadly speaking, are expressed in controls and early infection but not during later  
325 infection and is enriched for genes involved in the metabolism of carbohydrates, steroids and lipids, as well  
326 as cellular respiration. Group v and Group vi largely trend in the same direction, with genes in both groups  
327 tending to be expressed in control samples 72 hours and later and a handful of exposed samples, including  
328 three samples (one 48 hour sample and two 96 hour samples) that behave aberrantly compared to other  
329 biological replicates. These groups are enriched for genes with functions in broad and basic cell functions  
330 including DNA synthesis and repair, transcription, translation and cell cycle control (Group v) as well as  
331 protein localization, mitochondrial translation, autophagy and homeostasis (Group vi).

332 Following our initial overview of host transcription, we next looked at genes that were consistently  
333 different between control and exposed samples from 24-72 hours (Figure 4D). We excluded all cadaver  
334 samples (both 96 and 120 hours) from this pooled analysis because the animals are dead, and variations in  
335 gene expression would be confounded by mRNA degradation. We also opted to exclude animals at 96 hours  
336 because two of these three samples do not show immune induction (Figure 4C, Group ii). One-way  
337 ANOVA analysis between exposed and control animals from 24-72 hours demonstrated that genes that are  
338 under-expressed in exposed animals are enriched for a handful of metabolic processes, including arginine  
339 and glutamine synthesis. Interestingly, both arginine and glutamine are amino acids synthesized from the  
340 Krebs's cycle intermediate alpha-ketoglutarate. In times of starvation, the cell would be expected to  
341 prioritize generating ATP via the Krebs's cycle over synthesizing these amino acids. The idea that the fly is  
342 starving is consistent with these enrichments and also with the observation that basic cell metabolism  
343 (macromolecule synthesis) is substantially decreased at 72 hours (Fig S7).

344 The same analysis shows that genes that are over-expressed in exposed animals are enriched for  
345 immune function, including the melanization defense response and Toll-dependent pathways. *E. muscae*  
346 *Berkeley* infection relies on boring through the host cuticle which should elicit an initial melanization

347 response, consistent with our observation. However, it is generally thought that *E. muscae Berkeley* evades  
348 the host immune response once inside the fly because it grows without a cell wall (i.e. protoplastically) and  
349 therefore does not present antigens that can alert the fly immune system to infection [29,30]. Examining  
350 expression patterns of all genes annotated as having immune function, we see a large induction of immune  
351 gene expression at 24-48 hours which includes genes both involved in the melanization response and genes  
352 that specifically respond to fungal infection. In addition, we see overexpression of several groups of  
353 immune genes compared to uninfected controls that persists into late infection (72 and 96 hours) and even  
354 into death (96 and 120 hours) (Fig S8) These data suggest that the initial immune response may not be  
355 strictly limited to wound repair and show that the host immune system remains engaged throughout  
356 infection.

357

358 *E. muscae Berkeley* is present in the fly nervous system 48 hours after exposure

359 To better understand the process of *E. muscae Berkeley* infection in *D. melanogaster*, we next used  
360 a histological approach to examine the interior anatomy of exposed flies. Analogous to the transcriptomic  
361 time course, we collected adult flies (a mix of 50 males and females) every 24 hours for the first 168 hours  
362 after *E. muscae Berkeley* or mock exposure. Flies were fixed before embedding and sectioning in paraffin  
363 then stained with Safranin O/Fast Green (SFG), a contrast staining method that facilitates the differentiation  
364 of fungal versus host cells (Richard Humber, personal communication), though is more commonly used for  
365 plant histology. We identified *E. muscae Berkeley* morphology by examining *E. muscae Berkeley*-killed  
366 hosts. While there is slide-to-slide variability in the exact hue for a given tissue stained with SFG, generally,  
367 we observed that SFG-stained *E. muscae Berkeley* hyphal bodies have nuclei that stain red (or dark purple)  
368 and cytoplasm that stains purple (Figure 5). *E. muscae Berkeley* nuclei are consistently sized throughout  
369 the host which helps in distinguishing them from host *D. melanogaster* cells.

370



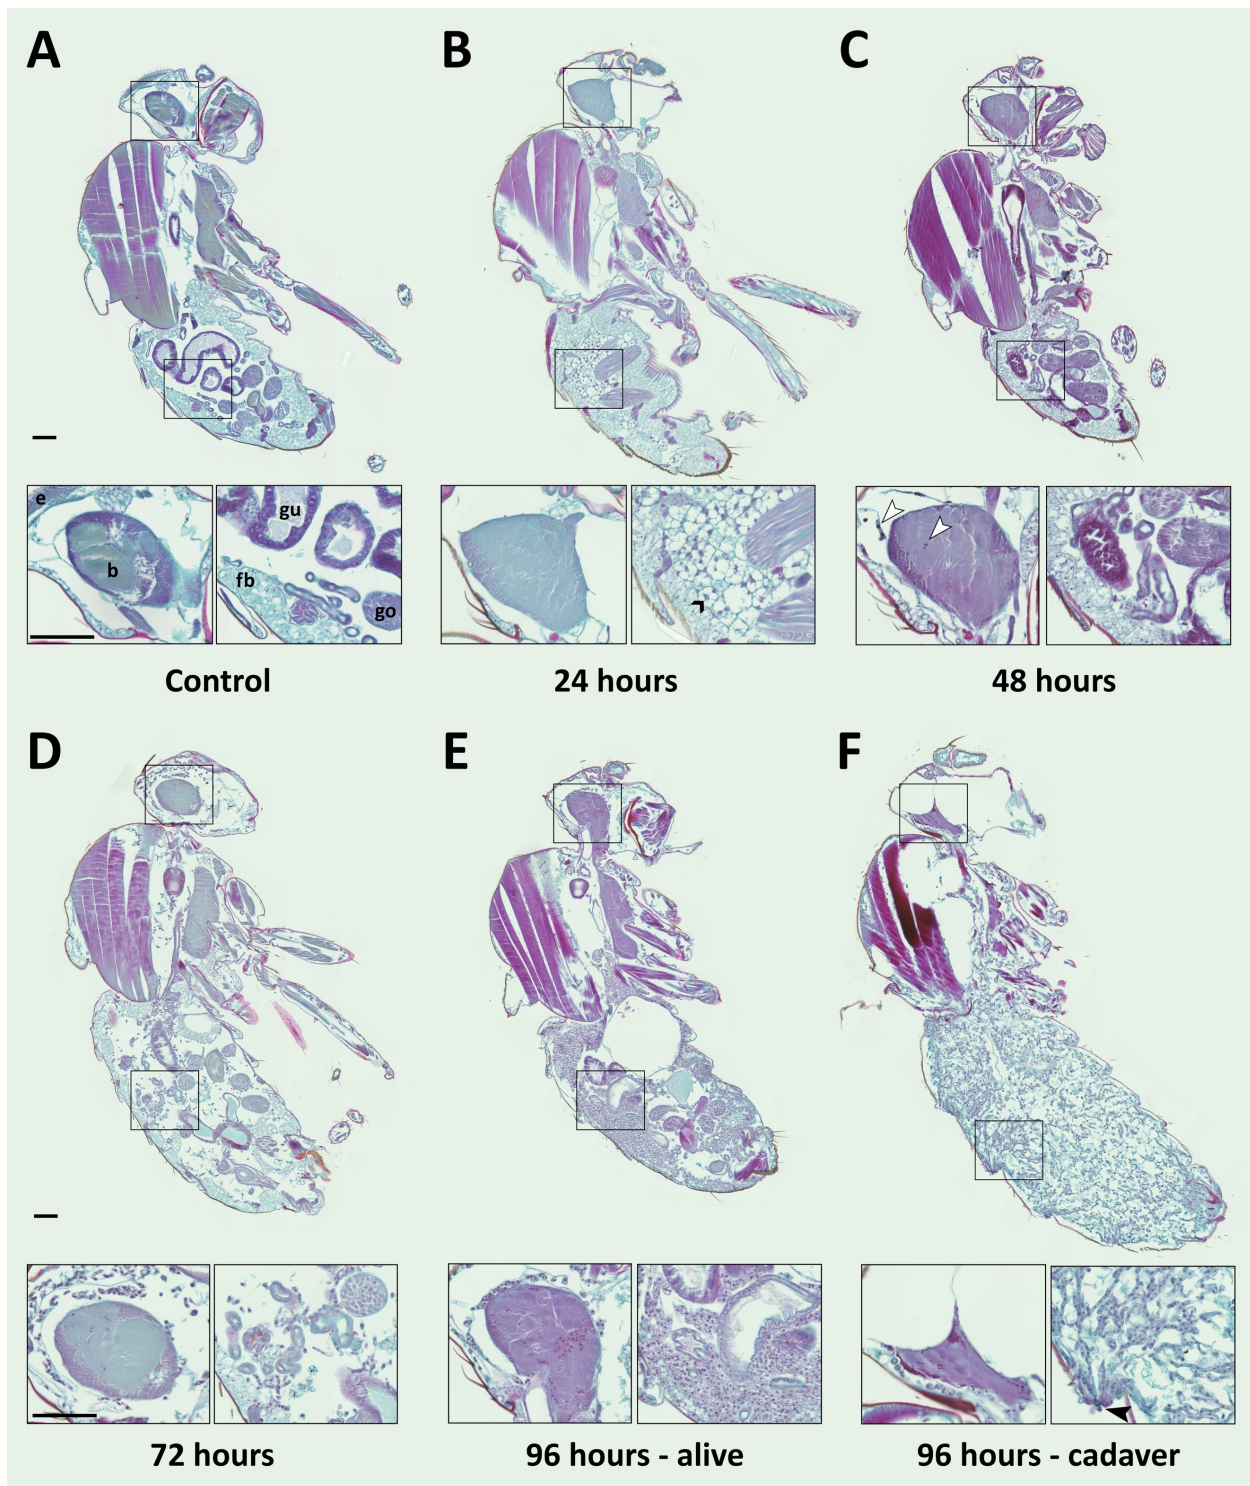

371

372 **Figure 5. *E. muscae* Berkeley is consistently present in the nervous system starting 48 hours after**  
373 **exposure.** CantonS flies were exposed or mock-exposed (control) to *E. muscae* Berkeley starting 3-5 hours  
374 after the light-dark transition and were subsequently sampled at 24, 48, 72 or 96 hours for histological  
375 analysis. For each time point, 4-6 individual, paraffin-embedded flies were sectioned at 8  $\mu$ m, stained using

376 Safranin O/Fast Green to identify fungal morphology and location and imaged at 20x magnification (Zeiss  
377 Axio Scan.Z1 slide scanner). Only male flies are shown here for ease of comparison. No differences in the  
378 progression of the infection were observed between males and females. An inset of the brain and the  
379 abdomen are shown for each sample. A) Uninfected fly with major anatomical features labeled as follows:  
380 e - eye, b - brain, g - gut, t - testes, f - fat body. B) At 24 hours after exposure there is significant  
381 immunological activity in the abdomen; the nervous system is devoid of fungal cells. C) At 48 hours after  
382 exposure *E. muscae Berkeley* cells are present in the brain (white arrowheads) and/or ventral nerve cord  
383 (VNC) of all but one sample where *E. muscae Berkeley* cells abut but have not yet entered brain. A handful  
384 of *E. muscae Berkeley* cells are observed in the abdominal and/or thoracic hemolymph at 48 hours. The gut  
385 and testes are not invaded by fungus. D) At 72 hours after exposure, *E. muscae Berkeley* can be found  
386 throughout the body cavity and the amount of visible fat body has decreased. *E. muscae Berkeley* titers  
387 have increased in the nervous system. E) In a living fly at 96 hours after exposure (the first point at which  
388 a fly may be killed by *E. muscae Berkeley* infection), fungus occupies virtually all available volume in the  
389 hemolymph. *E. muscae Berkeley* titers have increased in the nervous system, gut and gonads remain  
390 uninvaded. F) In an *E. muscae Berkeley*-killed fly (cadaver) at 96 hours after exposure, only traces of host  
391 organs remain in the abdomen and the nervous system has been considerably degraded. No fat body cells  
392 are observed. *E. muscae Berkeley* cells differentiate into conidiophores, cell-walled structures that will  
393 pierce through weak points of the cuticle to produce and launch infectious conidia. Black scale bars are 100  
394  $\mu\text{m}$ . All living animals shown are males; cadaver's sex is undetermined (the gonads have been consumed  
395 by the fungus.)

396  
397 We then carefully examined SFG-stained sections from exposed and control flies to determine  
398 where the fungus resides and how fly tissue is impacted over the course of infection (Figure 5). As we  
399 observed no difference in fungal localization between males in females, all samples from a given time point  
400 are described regardless of sex. In control animals, sagittal sections consistently show abundant fat body  
401 cells in the abdomen surrounding the gut and gonads. Fat body is also apparent, though less abundant, in  
402 the head and thorax. The thorax is predominantly occupied by muscles (generally staining red), which are  
403 also observed in the legs. At 24 hours after exposure, we observed hemocyte activity in the abdomen, with  
404 all other tissues indistinguishable from controls. Though hemocyte activity indicates that the immune  
405 system is responding to the fungus, we could not unambiguously identify the fungal cells anywhere in the  
406 body cavity at this time point. We must therefore conclude that the fungus adopts a morphology that is  
407 different from that of cadavers.

408 At 48 hours after exposure, fungal cells are consistently observed in the brain and/or ventral nerve  
409 cord (VNC; 4 out of 5 samples). In the one case where fungus had not invaded the nervous system, hyphal

410 bodies were apparent immediately adjacent to the brain, abutting the blood brain barrier. A handful of  
411 fungal cells are also observed in the abdomen or thorax, with some samples showing hemocyte activity as  
412 in 24 hour samples. At 72 hours after exposure, fungal growth is apparent throughout the body cavity and  
413 some hemocyte activity can still be observed. The fat body is depleted compared to earlier time points and  
414 fungus is apparent between muscle fibers, but the gut and gonads all appear indistinguishable from controls.  
415 In addition, fungal titers increase in the brain and VNC. In infected animals that survived 96 hours, fungal  
416 growth is rampant throughout the entire body cavity (head, thorax and abdomen), with the fat body  
417 substantially depleted and fungus residing between muscle fibers. There is no apparent damage to the gut  
418 or gonads. Occasional hemocyte activity can still be observed; fungal titers continue to increase in the brain  
419 and VNC. In *E. muscae Berkeley* killed cadavers, fungus is apparent throughout the body cavity, especially  
420 in the abdomen. The gut and gonads have been completely degraded by the fungus, the brain has begun to  
421 be degraded and the muscles are largely intact.

422 To confirm that the morphologies observed in the nervous system at 48 hours after exposure and  
423 beyond were *E. muscae Berkeley*, we used fluorescence *in situ* hybridization (FISH) to specifically label  
424 *E. muscae Berkeley* cells within the context of an infected fly. By performing FISH with a fluorescently-  
425 labeled DNA probe targeting the most abundant repeated 18mer in the *E. muscae Berkeley* genome  
426 (~11,000 copies, Bronski, Elya and Eisen, unpublished), we verified that *E. muscae Berkeley* is present in  
427 the brain and VNC in infected animals (Figure 6).

428

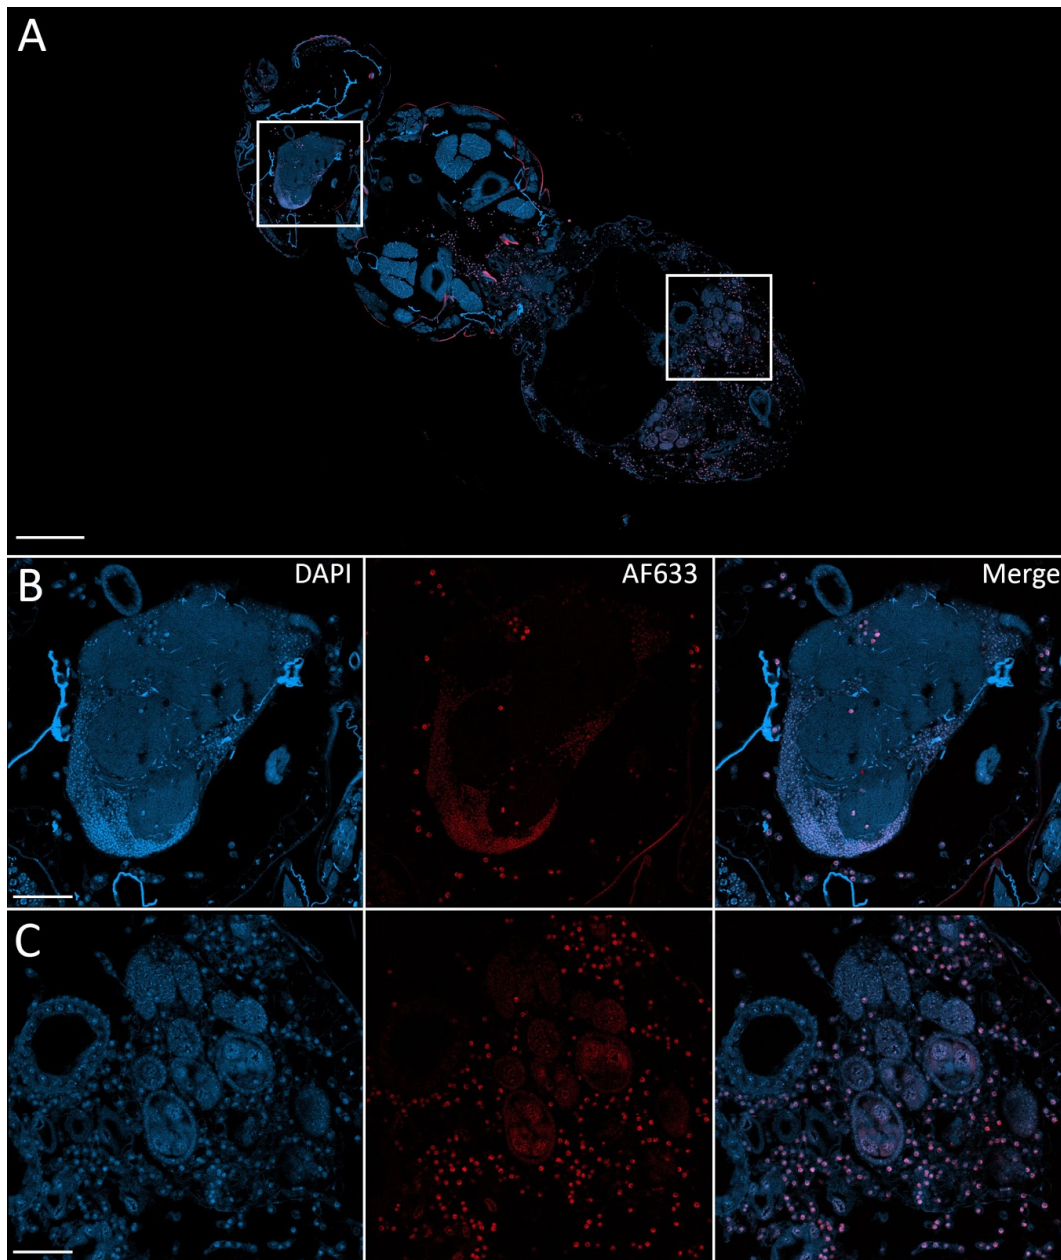

429

430 **Figure 6. Fluorescence in situ hybridization confirms that *E. muscae Berkeley* resides in the nervous**  
431 **system during infection.** CantonS flies were exposed or mock-exposed (control) to *E. muscae Berkeley*  
432 starting 3-5 hours after the light:dark transition and were subsequently sampled at 24, 48, 72 or 96 hours  
433 for histological analysis. For time points 48 hours and later, at least 3 individual, paraffin-embedded flies  
434 were sectioned at 8  $\mu$ m and subjected to FISH with an *E. muscae Berkeley*-specific 18mer DNA probe  
435 labeled at the 5' end with AlexaFluor633. Sections were imaged at 40x magnification on a confocal  
436 fluorescent microscope (Zeiss 800 LSM). A) Pseudo-coronal section of a female sampled 96 hours after  
437 infection stained with an *E. muscae Berkeley*-specific probe and DAPI. Regions shown at higher detail in  
438 B and C located are denoted by white boxes. Scale bar is 200  $\mu$ m. B) Enlargement of top region in A

439 showing each DAPI, AlexaFluor633 and merged images of this area. *E. muscae* Berkeley nuclei are  
440 strongly labeled and can be observed inside the host neuropil. Fungal nuclei are also observed in the head  
441 outside of the brain. Scale bar is 50  $\mu$ m. C) Enlargement of bottom region in A showing each DAPI,  
442 AlexaFluor633 and merged images of this area. *E. muscae* nuclei are observed in abundance outside of gut  
443 and ovaries. Scale bar is 50  $\mu$ m.

444

## 445 **Discussion**

446

447 A remarkably diverse array of microbes have independently evolved the ability to alter animal behavior.  
448 The prospect of understanding how they do this is intrinsically fascinating, and potentially of great practical  
449 value as a means to understand how animal behaviors are generated and how we might manipulate them in  
450 disease therapy, pest control and other contexts. While an increasing number of researchers have been  
451 drawn to these systems, sustained progress has been limited by the lack of anything approaching an ideal  
452 model system. We believe that the combination presented here of a strain of *E. muscae* that infects wild  
453 *Drosophila*, protocols for propagating this strain in lab.-reared flies, and the robust induction of behaviors  
454 in the laboratory has the potential as to serve the model system that finally allows us to successfully wield  
455 the tools of modern molecular genetics and neuroscience to describe the molecular mechanisms that  
456 underlie at least one example of microbial manipulation of animal behavior.

457

### 458 *E. muscae* in wild drosophilids

459 Though to our knowledge we are the first to study a naturally *Drosophila*-infecting strain of *E. muscae* in  
460 the laboratory, we are not the first to encounter *E. muscae* circulating in wild *Drosophila*. In 1927, Goldstein  
461 reported finding *Empusa muscae* (now *E. muscae*)-infected cadavers of *Drosophila repleta* as well as  
462 *Musca domestica* at Columbia University in New York state, stating that an epidemic of *E. muscae* had  
463 been observed for the previous four years in this location [20]. In 1969, Turian and Wuest reported  
464 observing *E. muscae*-infected cadavers of wild *Drosophila hydei* in a rotting fruit bait in Geneva,  
465 Switzerland [19]. In 2002, Keller et. al. reported morphological parameters for an *E. muscae* strain  
466 (putatively identified as *E. ferdinandii*, a member of the *E. muscae* species complex) infecting *Drosophila*  
467 *spp* in Switzerland [21].

468 Notably, the discovery of *E. muscae Berkeley* has not been our only observation of *E. muscae*  
469 infecting wild fruit flies. In fall of 2014, members of our group caught two individuals from the southern  
470 bay area that were some days later found killed by *E. muscae* (Quan and Schiabor, unpublished). During a  
471 return to the same site in fall 2015, we recovered several additional *E. muscae* cadavers. In the fall of 2016,  
472 a wild drosophilid collected from a site in the north bay was also killed by *E. muscae*. Interestingly, all of

473 these samples from Northern California, including those found in the fendel, are identical at the LSU and  
474 ITS loci. Samples recovered from a colleague at two distinct locations in Southern California show distinct  
475 sequences at these loci, suggesting that multiple strains (or species) are infecting wild *Drosophila*. Drawing  
476 from these observations as well as other unpublished reports of *E. muscae* infections in fruit flies across the  
477 continental United States (D. Tighe, S. Dara, B. de Bivort), we propose that *E. muscae* infections in wild  
478 *Drosophila* populations are more common than heretofore recognized. Based on our experience, the  
479 infections seem to be positively correlated with high, local densities of fruit flies in temperate habitats,  
480 which is consistent with how *E. muscae* infection is propagated.

481 It remains unclear both 1) if the strain(s) or species infecting *Drosophila spp* are distinct from those  
482 that infect other fly species and 2) the degree of specificity for *Drosophila spp* over other dipterans. We  
483 have observed that *E. muscae Berkeley*-infected *D. melanogaster* cadavers are capable of infecting *M.*  
484 *domestica* in the laboratory, but it is unclear if this infection occurs frequently in the wild. Whether infection  
485 can occur naturally would depend on the ecology of the two different host species (i.e. if they interact  
486 frequently enough to expect the exchange of *E. muscae* infection) Our understanding of strain diversity and  
487 host specificity would greatly benefit from the collection of more molecular and ecological data.

488

#### 489 The progression of *E. muscae Berkeley* infection in lab.-reared *D. melanogaster*

490 Taken together, our RNAseq and histology time course data describe the typical progression of *E. muscae*  
491 infection in lab.-reared *D. melanogaster*. At 24 hours after exposure, flies show a robust antifungal immune  
492 response, though the fungus is nearly undetectable within the fly by histology, indicating that it is at low  
493 titer. At 48 hours, the fungus has begun to adopt the morphology which it will assume until killing the host.  
494 Fungus is observable within the host brain and VNC, though overall fungal titer is still quite low. As the  
495 abdomen is the most likely point of initial entry for the fungus (it is the biggest target for the fungus to hit),  
496 we suspect that the fungus has travelled from the point of entry to the CNS, indicating tropism for neural  
497 tissue early in the infection. Elements of the host's immune response are still activated. At 72 hours, fungus  
498 was apparent throughout the body cavity, in the thorax (between muscle fibers), abdomen (surrounding but  
499 not invading the gut and gonads) and also in the limbs and halteres. The fat body is significantly depleted  
500 by this point; the host's dampened metabolism suggests an internal starvation state. At 96 hours, if the fly  
501 has not succumbed to infection (i.e. there are still energy reserves available to the fungus), fungal titer will  
502 continue to increase and the fat body will continue to be depleted. Two-three hours after death, flies that  
503 have been killed by the fungus show no intact abdominal organs and nervous systems that are being broken  
504 down.

505 While the trajectory of infection is consistent, it is important to recognize that just because two  
506 animals have been exposed for the same duration of time that these two animals will not progress through

507 infection identically. In our RNAseq data, we noticed that the host gene expression in exposed animals at  
508 24 and 48 hours tended to be more variable than those for 72 hours. We imagine that this was due to chance,  
509 that we picked animals that were at similar points in infection at 72 hours, whereas we picked animals that  
510 were more variable at other time points. This may at least partly explain why we observed so much  
511 differential expression at the 72 hour time point in exposed versus controls whereas less was observed at  
512 earlier time points, especially at 48 hours. It is likely that several factors play into whether or not an infection  
513 succeeds and how quickly it progresses (e.g. initial exposure titer, size of host, nutritional status of host  
514 etc.). Thus, future work should consider how to determine a metric to gauge progress of infection so that  
515 similarly-progressed samples can be compared.

516

#### 517 *E. muscae Berkeley* infection and host immune response

518 The entomopathogen community has believed that *E. muscae* evades the host response by growing  
519 protoplastically (i.e. without a cell wall, components of which would be recognized and targeted by the host  
520 immune system). In both the gypsy moth and the greater wax moth, it has been shown that the host immune  
521 cells recognize walled *Entomophaga* fungal cells, but there is little cellular response to protoplasts [31,32].  
522 Based on these findings, it has been posited that the host does not detect the ever-increasing fungal mass  
523 within until the end of infection when the fungus puts on a cell wall that contains epitopes that the host can  
524 recognize [29,30]. As a result of ostensibly evading the immune system, it has also been hypothesized that  
525 *E. muscae* does not generate toxins, as it would have no incentive to do so in the absence of attack by the  
526 host [29].

527 Our data show that there is a robust initial response to *E. muscae Berkeley* exposure. Many of the  
528 immune genes that are induced with *E. muscae Berkeley* have also been observed to be induced by exposure  
529 to other, more generalist fungal pathogens (e.g. *Beauveria bassiana*, *Metarhizium anisopliae* [33,34]).  
530 These data clearly indicate that the host detects an invader early on in infection. Furthermore, there is a  
531 detectable immune response through the length of infection (Fig S8), though at this point we cannot say if  
532 this response is a slow disengagement of the initial response or stimulated *de novo* by the growing fungus.

533 Interestingly, the living animals sampled at 96 hours for RNAseq are inconsistent in their host  
534 transcriptional immune response: two of the three animals more closely resemble control animals than  
535 infected animals in host transcription (Figure 4C). At least two scenarios could explain this observation. It  
536 is possible that both of these animals were in the process of recovering from infection (i.e. the immune  
537 system was effectively combatting the fungus) or there was a delay in the course of infection compared to  
538 contemporaneous samples. The proportion of fungal reads present in these samples is lower than what  
539 would be expected for late time points, which is consistent with either scenario. At this point we simply do  
540 not know if every instance of a spore hitting a fly leads to a productive fungal infection. There is some

541 evidence to the contrary: we have consistently observed that some highly-exposed flies die prematurely.  
542 These animals are generally smaller than others in the vial and are often covered in spores. This could  
543 indicate that getting hit by too many spores (an unlikely outcome in the natural world) leads to an  
544 overwhelmed fly (e.g. overactive immune system or accelerated fungal growth) that dies before being  
545 manipulated. These flies do not sporulate, though it is possible that they do produce resting spores. On the  
546 other hand, we have observed that survival of exposed flies is substantially increased when flies are exposed  
547 to small quantities of anti-fungal. This indicates that there are ways of either halting or slowing an infection,  
548 though whether the fly's immune system is generally capable of doing this is unknown.

549         Though five of our six cadavers sampled for transcriptomics have similar levels of immune gene  
550 transcripts compared to *E. muscae Berkeley*-exposed animals sampled at 72 hours, the sixth cadaver  
551 exhibits higher expression of anti-fungal peptides Drosomycin and Metchkinowin, the beta-glucan receptor  
552 GGBP3-like and several IM family genes. It is possible that this fly is demonstrating the proposed immune-  
553 system overload and resultant spike in immune system gene expression [29]. It might be the case that this  
554 immune spike occurs in all animals; we could have sampled too late to observe it in the other five samples  
555 but were able to see it in one sample that was late to respond. However, one can imagine that in the presence  
556 of copious fungal epitopes the fly immune system would continue to go be highly engaged until death, not  
557 drop back down to levels comparable to earlier time points (i.e. 72 hours), as seen in the majority of sampled  
558 cadavers. At present, we are inclined to interpret this odd-sample-out as a fluke rather than an indication of  
559 a moribund immune spike.

560

#### 561 Why is *E. muscae Berkeley* in the brain?

562 Our work demonstrated that *E. muscae Berkeley* is present in the nervous system system relatively early in  
563 infection, just 48 hours following exposure. *E. muscae Berkeley*'s invasion of the nervous system grants  
564 the fungus direct access to host neurons and may be mechanistically important for achieving behavioral  
565 manipulation of the host fly. However, we should be careful to consider any and all possible ways *E. muscae*  
566 *Berkeley* could alter host behavior before jumping to this conclusion.

567         We can imagine four general mechanisms by which *E. muscae* is able to achieve behavioral  
568 manipulation. The fungus could invade the nervous system in order to localize adjacent to and impinge on  
569 the activity of particular neurons through chemical or physical means. However, we are skeptical that this  
570 is the case as our observations do not support specific localization of the fungus in the CNS.

571         A second possibility is that the fungus invades the nervous system in order to gain access to either  
572 a particular group or groups of neurons or all neurons generally, but does not localize within the CNS in a  
573 stereotyped manner. Rather it is sufficient that it has crossed the blood brain barrier, which insulates the  
574 nervous system from the activities in the hemolymph and allows for the selective transport of compounds



575 to and from the hemolymph, allowing the fungus to modulate the activity of neurons by secreting  
576 compounds that diffuse throughout the CNS. The secreted compounds could be specific, only altering the  
577 activity of a subset of susceptible neurons, or could be more general, changing activity over many or all  
578 neurons.

579 A third possibility is that the fungus does not need to invade the nervous system in order to change  
580 the host's behavior. The fungus could be secreting a compound into a hemolymph that is capable of crossing  
581 the blood brain barrier and altering neuronal activity. Alternatively, the fungus could be secreting a  
582 compound into the hemolymph that changes the host's internal state (either directly or by leading the host  
583 to respond in a way that causes the internal state to change) which leads the animal to respond by executing  
584 one or more of the end-of-life behaviors.

585 Lastly, it's possible that the fungus does not secrete compounds to induce these behaviors, but by  
586 destroying fly tissues elicits the series of observed behaviors. While we believe this last scenario to be  
587 highly unlikely, it cannot yet be ruled out.

588 For these last two proposed mechanisms, the fungus would not need to invade the CNS in order to  
589 affect behavior. In these cases, the fungus could be invading the CNS as a means of escaping immune  
590 surveillance. By establishing a reservoir in the CNS, the fungus could replenish dying cells in the  
591 hemolymph in order to ensure that the infection took hold. Alternatively, the fungus could invade the CNS  
592 because it provides a rich, nutritive substrate to sustain the fungus. This scenario is inconsistent with our  
593 histological data both from flies that are not executing end-of-life behaviors (Figure 5) and flies that are  
594 executing end-of-life behaviors show that the brain is largely intact, indicating that the fungus abstains from  
595 consuming these tissues until host death.

596 Our observation that *E. muscae Berkeley* invades the host nervous system contrasts with the recent  
597 report that *Ophiocordyceps unilateralis*, a fungal pathogen that induces very similar end-of-life phenotypes  
598 in the ant host *Camponotus castaneus* is absent from the brain at the point of behavioral manipulation [35].  
599 Interestingly, another Entomophthoralean fungus, *Strongwellsea magna*, is also known to invade the  
600 nervous system of its lesser house fly host (*Fannia canicularis*) during infection [36]. In this case, the  
601 author proposed that this did not have consequences for behavior.

602 Surprisingly, transcriptomic analysis of dissected brains from exposed females at 24, 48 and 72  
603 hours with confirmed *E. muscae Berkeley* infections failed to show differential gene expression compared  
604 to uninfected controls but did show an increase in *E. muscae Berkeley* titer (taking *E. muscae Berkeley*  
605 reads as a proxy) (Fig S9). Though these samples were not collected at the point of behavioral manipulation  
606 by the fungus, it is surprising that there are no major transcriptional changes within the brain at these time  
607 points, and suggests that behavioral modification may be largely independent of transcriptional changes in  
608 the brain.

609

610 Behavior and beyond: the utility of the *E. muscae Berkeley-D. melanogaster* system

611 The past decade has seen an explosion of tools for characterizing and manipulating the nervous system of  
612 *D. melanogaster*, including a catalog of the types and corresponding expression patterns of its  
613 approximately 100,000 neurons, a complete map of connections in the brain, reagents for conditionally  
614 activating or disabling specific sets of neurons as well as purifying these cells, and methods for  
615 automatically tracking and classifying behaviors in populations. Our development of a robust system of  
616 microbially induced behavior manipulation in *D. melanogaster* will allow us, and we hope many others, to  
617 leverage the powerful molecular and neurobiological toolkit of *D. melanogaster* to explore the molecular  
618 basis of this fascinating but still mysterious biological phenomenon.

619

620 **Acknowledgements**

621

622 This research was supported by the MBE's Investigator Award from the Howard Hughes Medical Institute  
623 and CE's Graduate Research Fellowship from the National Science Foundation. This work used the Vincent  
624 J. Coates Genomics Sequencing Laboratory at UC Berkeley, supported by NIH S10 OD018174  
625 Instrumentation Grant. The authors are grateful to Richard Humber whose expertise in all things  
626 *Entomophthora*, and his eagerness to educate us, was invaluable throughout, Michael Vahey and Brian  
627 Belardi in Dan Fletcher's group for assistance with high-speed videography, Ciera Martinez for developing  
628 a protocol to embed and section flies in paraffin, Steve Ruzin and Denise Schneides at the Berkeley Imaging  
629 Facility (College of Natural Resources, UC Berkeley) for their expertise and patience in microtomy and all  
630 things microscopy, Jen-Yi Lee for her guidance in using equipment in the Molecular Imaging Center  
631 (College of Natural Resources, UC Berkeley), Kristin Scott, Russell Vance, Damian Elias and Richard  
632 Calendar for advice, feedback and support during this project, William Ludington for his reminder that  
633 "fruit flies like a banana", and Michael Bronski for introducing the Eisen Lab to the wonderful world of  
634 entomopathogens. CE also acknowledges the support of Nora, Bruce and Kevin.

635

636 **Author Contributions**

637

638 CE discovered *Drosophila* infected with *Entomophthora* in her backyard, figured out how to reliably  
639 passage the infection to lab-reared flies, carried out all of the experiments described in this paper, made all  
640 the figures and wrote the manuscript. TCL and QES helped maintain populations of infected flies for  
641 experiments and provided experimental assistance, and HM assisted with the early characterization of the

642 *Entomophthora* infection. MBE encouraged the pursuit of this project by CE, obtained funding for the  
643 research, provided feedback and ideas throughout, and edited and advised on figures and the manuscript.

644

## 645 **Funding**

646

647 All of the research described in this paper was funded by an HHMI Investigator award to MBE. CE was  
648 supported by a National Science Foundation Graduate Research Fellowship. CCM was supported by a  
649 National Science Foundation Postdoctoral Fellowship.

650

## 651 **Materials and Methods**

652

### 653 Fly husbandry

654 Healthy wild-type, CantonS Wolbachia-free (WF) *D. melanogaster* were reared on Koshland diet (0.68%  
655 agar, 6.68% cornmeal, 2.7% yeast, 1.6% sucrose, 0.75% sodium tartrate tetrahydrate, 5.6 mM CaCl<sub>2</sub>, 8.2%  
656 molasses, 0.09% tegosept, 0.77% ethanol, 0.46% propionic acid) supplemented with activated dry yeast  
657 pellets (Red Star) at 21C on a 12:12 light:dark photoperiod. Any time the photoperiod needed to be adjusted,  
658 flies were reared from third instar or earlier on the desired photoperiod to ensure that emerging adults were  
659 properly entrained.

660

### 661 Fendel tending

662 Wild fruit flies were caught by directly aspirating from an uncovered plastic dishwashing pan (aka the  
663 “fendel”) that was baited with quartered organic watermelon and an assortment of other organic fruits.  
664 Aspirated flies were transferred onto Koshland diet and housed at ambient temperature and ambient  
665 humidity. Baiting and capture was performed in the spring through early fall of 2015 at a personal residence  
666 in Berkeley, CA.

667

### 668 PCR genotyping

669 DNA was extracted from individual cadavers or 1.5 mL of *in vitro* culture using the QIAamp Micro Kit  
670 (QIAGEN) following the tissue protocol. These DNA preparations were used to amplify the desired  
671 sequences. *Entomophthora*-specific ITS primers (emITS: emITS-1 5’-  
672 TGGTAGAGAATGATGGCTGTTG-3’, emITS-4 5’- GCCTCTATGCCTAATTGCCTTT-3’) or fungal-  
673 specific large subunit primers (LSU: LR3-1 5’- GGTCCGTGTTTCAAGAC-3’, LR0R-4 5’-  
674 GTACCCGCTGAACTTAAGC-3’) were used to genotype *Entomophthora* (James et al 2006); cytochrome

675 oxidase II primers (tLEU: 5' ATGGCAGATTAGTGCAATGG 3' and tLYS: 5'  
676 GTTTAAGAGACCAGTACTTG 3') were used to genotype infected *Drosophila* hosts (Liu and  
677 Beckenbach (1992). Each reaction was performed using GoTaq 2x colorless mastermix (Promega) with  
678 800 nM of each forward and reverse primer with the following thermocycling conditions: 95C for 5 min  
679 followed by 35 iterations of 95C for 30 seconds, 51C for 30 seconds then 72C for 1 min/kb then 72C for  
680 an additional 10 minutes. Reactions were checked by gel electrophoresis in 1% agarose. Successful  
681 reactions were prepared for sequencing using ExoSap-IT (Affymetrix) per manufacturer's instructions and  
682 submitted with each amplification primer for Sanger sequencing. Assembly of forward and reverse reads  
683 was attempted to generate a consensus sequence using Seqman Pro (DNA Lasergene v.10). Sequences were  
684 searched against the BLAST NT database using blastn.

685

#### 686 Isolating *E. muscae* Berkeley in vitro

687 To grow *E. muscae* Berkeley in vitro, first spores were collected using the ascending conidia collection  
688 method (i.e. by placing a fresh cadaver in the bottom of a sterile petri dish and allowing the cadaver to  
689 sporulate overnight) (144). The following morning, the lid of the dish was rinsed with 10 mL of Grace's  
690 insect medium (1x) supplemented with L-glutamine, 3.33g/L lactalbumin hydrolysate, 3.33g/L yeastolate  
691 (ThermoFisher Scientific # 11605-094) containing 5% fetal bovine serum (Invitrogen) and transferred to  
692 a vented, treated T25 tissue culture flask (Corning # 10-126-10) using sterile technique. The culture was  
693 then incubated at room temperature in the dark until growth was apparent (non-homogenous white spheres  
694 floating in the medium). The culture was genotyped with emITS and LSU primers to confirm that it was *E.*  
695 *muscae* and was an identical match to the cadaver that produced the spores which started the culture  
696 ("Fendel mama") at these loci. The culture was periodically examined at 100-400x on a compound  
697 microscope to confirm proper morphology and absence of contamination.

698

#### 699 Isolating and optimizing in vivo *E. muscae* Berkeley infection

700 Wild fruit flies sampled from the fendel and housed on Koshland food were monitored nightly for two  
701 weeks after capture for deaths due to *E. muscae* Berkeley. Freshly killed cadavers were separated from their  
702 living conspecifics by briefly anesthetizing live flies via cold anesthesia (incubating 2-3 minutes in a  
703 residential freezer). Fresh cadavers (anywhere from 1-10, depending on availability) were placed on chunks  
704 of organic banana in a wide Drosovial with kimwipes to sop up excess moisture. Approximately 50 healthy  
705 flies were then transferred onto the prepared vial by flipping (no anesthesia was used). The plug of the vial  
706 was pushed down to confine the flies within a few centimeters to improve the likelihood that they would  
707 encounter flying spores. Leaving the exposed flies with the spent cadavers was initially problematic as we  
708 were working without access to anesthesia or a microscope and had to identify new cadavers by naked eye.

709 Additionally, the raw banana began to ferment and break down, leading to excess moisture which was  
710 prematurely killing some of our exposed flies. To avoid these issues, the exposed flies were transferred to  
711 a new banana/kimwipe vial after the first 48 hours. This was done by allowing the living flies to climb into  
712 an empty “holding” vial then flipping them onto the fresh vial. The flies were monitored daily for deaths;  
713 cadavers were removed after allowing healthy flies to climb into a “holding” vial and used to start new  
714 exposure vials.

715

#### 716 In vivo propagation of *E. muscae* Berkeley infection

717 Cadavers are collected daily 2-5 hours after the end of the 12 hour light cycle from exposure vials that are  
718 between 96 and 168 hours (4 and 7 days) old. All flies that will die on this day because of *E. muscae*  
719 Berkeley infection will be dead by this time and will be extremely swollen with fungal growth, making  
720 them obvious among the living flies. CO<sub>2</sub> is used to anesthetize the living flies in exposure vials and collect  
721 cadavers, which are placed in a petri dish with a piece of Whatman paper wetted with DI water to mitigate  
722 static. Molten cadaver embedding medium is prepared by microwaving solidified AS solution (1.5% agar,  
723 10% sucrose) and poured into a clean 100 x 15 mm petri dish just enough to cover the bottom of the dish.  
724 As soon as the agar has set, six cadavers are embedded head first in a circle of diameter <2 cm with their  
725 wings on the outside of the circle. The wings are pressed into the agar to ensure they do not intercept any  
726 launched conidia. The agar is allowed to completely set before continuing. The cadaver circle is cut out  
727 from the set agar by using an empty, wide-mouth Drosophila vial (FlyStuff). The agar disc containing the  
728 fly circle is then transferred, cadaver-side up, into an empty, wide-mouth Drosophila vial. A ruler is used  
729 to mark 2 cm above the surface of the agar. CantonS flies reared on the same 12 hour light cycle on  
730 Koshland medium are collected from eclosing vials using CO<sub>2</sub> anesthesia. Fifty healthy flies are added to  
731 the vial containing the agar disc with cadavers and tapped down until all flies are under the 2 cm mark. A  
732 Droso-plug (FlyStuff) is pushed into the vial such that its bottom is flush with the 2 cm mark. The vial is  
733 incubated for the first 24 hours at 18C in a humid chamber (~95% humidity, 2L plastic beaker lined at the  
734 bottom with wetted paper towels or kimwipes and covered with foil), to encourage sporulation. After 24  
735 hours, the Droso-flug is lifted to relieve the confinement of the flies and the vial is moved to a 21C incubator  
736 (~60% humidity). After 48 hours, the exposed flies are transferred onto GB+ medium (40% organic banana  
737 [w/v], 2% agar, 0.3% propionic acid) without anesthesia; incubation continues at 21C. Cadavers are  
738 collected daily 2-45 hours after the end of the 12 hour light cycle from exposure vials that are between 96  
739 and 168 hours (4 and 7 days) old. The process is repeated daily to supply cadavers for experiments and  
740 ensure the infection is maintained.

741

#### 742 Photography and videography

743 Pictures and videos of dead and dying flies (extending probosces and raising wings) were taken with a  
744 Nexus 5x (Google) or iPod Touch (Apple) aided by attaching a macrolens (Luxsure) to the device camera  
745 lens or by aligning the device camera lens with the eyepiece of a dissecting scope. Images were taken under  
746 ambient light, humidity and temperature.

747 Time lapse microscopy was taken via a USB microscope (DinoLite Digital Microscope Pro) using  
748 DinoLite software v1.12 (Figure 3A) or on a Nikon 80i compound microscope equipped with a Hamamatsu  
749 black and white camera (C11440) using MetaMorph software (v. 7.8.00, Molecular Devices) (Figure 3B,C).  
750 Each time lapse consists of images collected once a minute for the indicated duration. Images were taken  
751 under ambient temperature and humidity.

752 High-speed videos (18,000-54,000 fps) were filmed with a 5x objective on a Axiovert 200  
753 microscope (Zeiss) equipped with an Photron Fastcam 1024PCI. Cadavers were mounted in 1.5% agar on  
754 a glass slide and arranged such that forming conidiophores and conidia were visible (for spore ejection) or  
755 such that cadavers sporulated onto a #1 glass coverslip in the plane of the camera (for spore landing). Video  
756 was captured via Photron Fastcam Viewer software, running at the indicated frames per second in end  
757 trigger mode (new frames were continually captured and old frames dumped until the user triggered the  
758 filming to stop). Spores or landing sites were manually watched until a spore disappeared or appeared, then  
759 video was stopped and last ~10 seconds of footage were manually searched for the spore launching or  
760 landing event.

761

#### 762 Circadian timing of death

763 CantonS WF flies were reared on a 12:12 light cycle (photophase 1 am – 1 pm or 7 pm - 7 am PDT, as  
764 indicated). For experiments run in complete darkness, 25 flies were exposed to *E. muscae* Berkeley via the  
765 standard anesthesia-dependent protocol. All exposure vials were set up before the utilized cadavers  
766 sporulated (within 2 hours of the light-dark transition). Exposure vials were housed in a humid chamber in  
767 a dark 21C incubator wrapped in blackout cloth for approximately 24 hours before loading into *Drosophila*  
768 activity monitors (DAMs, Trikinetics). Before loading flies, DAM tubes (5 mm x 65 mm, polycarbonate)  
769 were prepared containing such that one end of the tube held approximately one cm of 1.5% agar, 10%  
770 sucrose and was wrapped in parafilm to prevent drying out.

771 To load the flies, all accessible light sources were disabled before removing the humid chamber  
772 from 21C and placing on the bench at RT. Vials of flies were kept under a foil-lined box as they waited to  
773 be processed. One vial at a time was retrieved from the box, knocked out with CO<sub>2</sub> under a dissecting scope  
774 whose LED light ring was covered with a red gel filter (Neewer), sorted by sex and loaded into individual  
775 DAM tubes with the aid of a red LED flashlight (KMD Aero) before capping each tube with an autoclaved  
776 cotton plug. For each vial, eight females and eight males were chosen for loading into DAM vials.

777 Unexposed flies (i.e. controls) were always processed before proceeding to exposed flies. CO2 pad was  
778 wiped down with 70% ethanol between vial types to prevent cross-contamination. DAMs were loaded from  
779 bottom to top row, filling a row and securing each tube with rubber bands before proceeding to the next.  
780 Loaded tubes were kept under a foil-lined box to prevent light exposure. When all loading was finished,  
781 DAMs were covered with blackout cloth and transported back to the 21C incubator. There they were  
782 attached to the DAM interface unit and recording began, binning counts in 30 second intervals. Recording  
783 continued for ~170 hours until the experiment was stopped.

784 Like with loading, experiments were stopped by first disabling all light sources, then carefully  
785 disconnecting and removing DAMs from the 21C incubator to not disturb adjacent experiments, and sealing  
786 incubator before turning on the overhead lights for manual inspection. Each DAM tube was inspected to  
787 see if the fly was dead or alive. If dead, the tube was inspected for evidence of sporulation to determine if  
788 the cause of death was patent *E. muscae* infection. For experiment run on a 12:12 light cycle, flies were  
789 exposed as above but without concern for light contamination; resultant DAMs were housed on a 12:12  
790 light cycle for the duration of the experiment. Each channel was checked daily following sundown to see  
791 which flies had died within the previous 24 hours.

792 DAM data were processed using Python to determine time of last movement (accurate to 30  
793 seconds) and to plot movements over time. For each channel, the reported time of last movement was  
794 manually cross-checked using the plot of activity data. In cases where there was an erroneous movement  
795 (i.e. a signal occurring more than 24 hours after the fly's last movement), the time of last death was manually  
796 re-assigned. For data visualization, data were binned into 15-30 minute intervals and the average  
797 movements of unexposed animals (controls), exposed or entrained light cycle of exposed flies and cadavers  
798 and the time of last movement for each observed cadaver were plotted in Prism (GraphPad). There were  
799 generally no obvious differences between male and female activity for the unexposed animals so sexes were  
800 combined for data analysis.

801

#### 802 Collection and staining of primary conidia

803 Three to six fresh cadavers (i.e. those who had not yet sporulated) were collected from exposure vials using  
804 the anesthesia dependent methods detailed above. Sporulation chambers were prepared as follows: a small  
805 piece of Whatman paper was placed in the base of a small petri dish (60 mm x 15 mm) and wetted with DI  
806 water. A bloated cadaver was chosen for each chamber and its wings were removed. The cadaver was  
807 placed in the middle of the Whatman paper and the chamber was topped with a custom, 3D-printed top that  
808 included a square opening slightly smaller than a standard 22x22 mm coverslip. The top and bottom were  
809 sealed using parafilm and a new coverslip was placed over the opening. Cadavers were left in the chambers  
810 at room temperature to sporulate. Coverslips were changed every 30 minutes to 1 hour, as needed, and

811 promptly stained for microscopy by applying Hoechst (1 ug/mL). Spores were imaged on a compound  
812 microscope at 40x for measuring conidia attributes; exact distances were determined by calibration with a  
813 0.01 mm micrometer (OMAX). For each attribute (number of conidia, length and width of conidia, diameter  
814 of nuclei), at least 50 different primary conidia were counted from three different cadavers.

815

#### 816 RNA experiments

817 RNA was prepared from each thawed sample by homogenizing with an RNase-free pestle (Kimble Chase),  
818 washing the pestle with 750 uL Trizol, then proceeding using the manufacturer's protocol. For reverse-  
819 transcription PCR (RT-PCR) and transcriptomic experiments, three mock vials and three Three mock vials  
820 and three exposure vials were started with 25 CantonS WF flies 0-1 days old (RT-PCR, whole flies) or 1-2  
821 days old (dissected brains) with either 0 (mock) or 6 (exposure) cadavers embedded in AS. Flies were  
822 incubated for the first 24 hours at 18C confined to 2 cm with cadavers, then moved to 21C where the  
823 confinement was relieved. Flies were transferred to GB+ at 48 hours where they continued to be housed at  
824 21C. (Vials were sampled every 24 hours for 72 (dissected brains), 96 (RT-PCR) or 120 (whole flies) hours  
825 by anesthetizing the entire vial with CO<sub>2</sub>. Exposed animals were preferentially selected based on evidence  
826 of contact with fungus (e.g. spores or melanization responses thereto visible on cuticle). Sampling for each  
827 time point consistently occurring between 2-3 hours following the light-dark transition. Before sampling,  
828 all equipment used to manipulate flies (e.g. CO<sub>2</sub> pad, forceps etc.) were treated with 10% bleach, wiped  
829 with DI water then sprayed with 70% ethanol. All materials that handled flies (CO<sub>2</sub> gun, pad, forceps) were  
830 treated with 10% bleach and rinsed with DI water between sampling exposure vials. Control vials were  
831 always sampled first. Sampled material (either whole fly or dissect brain) was immersed in 250 uL Trizol  
832 then immediately flash frozen with liquid nitrogen. Samples were stored at -80C until extraction.

833

#### 834 RT-PCR

835 One control female (24-96 hours) and two infected females (24-72 hours) or one fresh cadaver (96 hours)  
836 from each vial were collected as described above. RNA was prepared from each thawed sample by  
837 homogenizing with an RNase-free pestle (Kimble Chase), washing the pestle with 750 uL Trizol, then  
838 proceeding using the manufacturer's protocol. RNA was then treated with Turbo DNase (ThermoScientific)  
839 per the manufacturer's protocol and quantified using a Qubit Fluorometer (Qubit RNA HS assay kit,  
840 ThermoFisher Scientific). For each sample, 1 µL or 160 ng of DNase-treated RNA, whichever was more,  
841 was added to a new, nonstick tube and mixed with two pmol primer emITS1, 770 nM dNTPs in a final  
842 volume of 13 µL. The reaction was incubated at 65C for 5 minutes then incubated on ice for at least 1  
843 minute before proceeding. To the mixture was added 5x First Strand Buffer (1x final, ThermoFisher  
844 Scientific), 100 mM DTT (5 mM final, ThermoFisher Scientific), 1 uL RNaseOUT (ThermoFisher



845 Scientific) then 200 units of SuperScript III RT (ThermoFisher Scientific). After thorough mixing, each  
846 tube was incubated at 55C for 60 minutes to reverse transcribe then 70C for 15 minutes to heat kill the  
847 transcriptase. To amplify *E.muscae*-specific cDNA, 2 uL of the reverse transcription reaction was mixed  
848 with GoTaq 2x colorless mastermix (1x final, Promega) and 500 nM each primers emITS1 and emITS4  
849 (5'- GCCTCTATGCCTAATTGCCTTT-3') then run on a thermocycler with the following settings: 95C  
850 for 5 min followed by 35 iterations of 95C for 30 seconds, 61C for 30 seconds then 72C for 30 seconds  
851 then 72C for an additional 10 minutes. Four µL of each reaction was analyzed by gel electrophoresis in 1%  
852 agarose.

853

#### 854 Whole fly *in vivo* RNAseq time course

855 One control female (24-120 hours) and two infected females (24-72 hours), one infected female and one  
856 cadaver (96 hours) or one cadaver (120 hours) from each vial were collected as described above. RNA was  
857 prepared from each thawed sample by homogenizing with an RNase-free pestle (Kimble Chase), washing  
858 the pestle with 750 uL Trizol, then proceeding using the manufacturer's protocol. RNA was quantified  
859 using a Qubit Fluorometer (Qubit RNA HS assay kit, ThermoFisher Scientific) and quality was checked by  
860 running on a RNA 6000 Pico chip on a Bioanalyzer 2100 (Agilent Technologies). High quality RNA was  
861 then treated with Turbo DNase (ThermoScientific) per the manufacturer's protocol. RNAseq libraries were  
862 prepared with the TruSeq RNA v2 kit (Illumina) using 500 ng of input RNA per sample. Samples were  
863 multiplexed 21 samples to a lane and sequenced using 100 bp paired-end reads on a HiSeq 4000 at the QB3  
864 Vincent J. Coates Genomic Sequencing Facility at UC Berkeley.

865

#### 866 Dissected brain RNAseq

867 Brains were individually dissected and sampled from first three control and then three exposed females.  
868 Each animal was dissected in sterile 1x PBS in its own disposable dissection chamber (35mm petri dish  
869 lined with 2-3% agar) and dissecting forceps were treated with 3.5% hydrogen peroxide then rinsed with  
870 sterile water between samples to prevent nucleic acid carryover. The body of each animal was saved and  
871 subjected to a DNA extraction using the manufacturer's provided protocol for the isolation of genomic  
872 DNA from tissues (QIAamp DNA Micro kit, QIAGEN) eluting in 20 µL of buffer AE. For each fly body,  
873 1 µL was used to template a PCR reaction consisting of 12.5 µL GoTaq, 2 µL of each primer emITS1 and  
874 emITS4 (10 µM stocks), and 7.5 µL water for a final volume of 25 µL. Reactions were cycled with the  
875 following conditions: 95C for 5 minutes followed by 35 cycles of 95C for 30 seconds, 51C for 30 seconds  
876 and 72C for 1 minute, then a final 10 minute extension at 72C. Reactions were analyzed via gel  
877 electrophoresis to confirm that all exposed animals had come into contact with *E. muscae* Berkeley and that  
878 control animals were uninfected.

879 RNA was prepared from each thawed sample by homogenizing with an RNase-free pestle (Kimble  
880 Chase), washing the pestle with 750 uL Trizol, then proceeding using the manufacturer's protocol. RNA  
881 was quantified using a Qubit Fluorometer (Qubit RNA HS assay kit, ThermoFisher Scientific) and quality  
882 was checked by running on a RNA 6000 Pico chip on a Bioanalyzer 2100 (Agilent Technologies). One  
883 replicate control RNA sample for the 48 hour time point was lost prior to library preparation so was omitted.  
884 High quality RNA was then treated with Turbo DNase (ThermoScientific) per the manufacturer's protocol.  
885 RNAseq libraries were prepared with the TruSeq RNA v2 kit (Illumina) using all of the extracted RNA for  
886 each brain, 17-75 ng of input RNA per sample. Samples were multiplexed 17 samples to a lane in equimolar  
887 amounts and sequenced using 100 bp paired-end reads on a HiSeq 4000 at the QB3 Vincent J. Coates  
888 Genomic Sequencing Facility at UC Berkeley.

889

#### 890 *E. muscae* reference transcriptome assembly

891 An initial reference (Emus-Ref1) was assembled from reads from exposed *in vivo* time course samples that  
892 had first failed to align as pairs to the *D. melanogaster* transcriptome (r6.11, HiSat2) then failed to align as  
893 singletons to the *D. melanogaster* genome (r.611, bowtie2) using TRINITY with the developer's  
894 recommended settings [37]. After assembly, all *in vivo* time course reads were aligned to Emus-Ref1 to  
895 assess contamination of non-*E. muscae* sequences. All Emus-Ref1 transcripts were searched using blastn  
896 for homology (evaluate  $1e-50$  or smaller) to organisms not annotated as fungi or virus. These transcripts were  
897 removed to generate Emus-Ref2. All *in vivo* time course reads were aligned to Emus-Ref2 to assess  
898 contamination of non-*E. muscae* sequences. Transcripts that were not expressed by any sample (TPM = 0)  
899 or where TPM of uninfected samples accounted for more than 10% of TPM summed across all samples  
900 were removed to generate Emus-Ref3. Transcriptome completeness was estimated by BUSCO v1.1  
901 analysis using the fungal reference set (1438 BUSCOs).

902

#### 903 RNAseq data analysis

904 To calculate gene expression, reads were pseudo-aligned to the appropriate reference (dmelDBGP6.rel85  
905 for *D. melanogaster* or Emus-Ref3 for *E. muscae*) and transcript abundance was estimated using Kallisto  
906 [38]. Data were analyzed using hierarchical clustering by gene (Cluster 3.0), ANOVA between grouped  
907 treatments (scipy.stats) and GO term analysis (Panther [39]). Hierarchical clustering heatmaps were  
908 generated in Java TreeView; other data were plotted in matplotlib (Python), Prism (GraphPad) or Excel  
909 2013 (Microsoft).

910

#### 911 Paraffin embedding and microtomy of whole flies

912 Two mock and two exposure vials were started daily for seven days each with 50 CantonS WF flies 0-1  
913 days old with either 0 (mock) or 6 (exposure) cadavers embedded in AS. Flies were incubated for the first  
914 24 hours at 18C confined to 2 cm with cadavers, then moved to 21C where the confinement was relieved.  
915 Flies were transferred to GB+ at 48 hours where they continued to be housed at 21C. Vials were sampled  
916 every 24 hours via CO2 anesthesia then infiltrated and embedded in paraffin. For detailed protocol, see  
917 [dx.doi.org/10.17504/protocols.io.k5ecy3e](https://doi.org/10.17504/protocols.io.k5ecy3e). Briefly, flies were fixed 24-36 in ice-cold Carnoy's (6:3:1  
918 ethanol:chloroform:glacial acetic acid) at 4C. Samples were next dehydrated by stepping through a series  
919 of increasing ethanol concentrations Samples were then transitioned into HistoClear (National Diagnostic)  
920 before slowly introducing Paraplast (Sigma). Samples were infiltrated with Paraplast for at least 84 hours  
921 at 60C with gentle shaking before embedding in base molds with embedding rings (Thermo Scientific) and  
922 drying overnight. Samples were stored at room temperature until they were sectioned at 8 µm with an  
923 RM2255 microtome (Leica), applied to Polysine slides (ThermoFisher Scientific) and dried overnight at  
924 42C. Sections were stored at room temperature for up to three weeks before Safranin O/Fast Green FCF  
925 staining or up to one week before fluorescence in situ hybridization (FISH).

926

#### 927 Safranin O/Fast Green FCF staining of paraffin sections

928 Slide-mounted sections were dewaxed with two, 10 minute changes of HistoClear then rehydrated to 70%  
929 ethanol with a decreasing ethanol series. Sections were then stained one-at-a-time following Johansen's  
930 Safranin and Fast Green protocol [40] then checked under a dissecting scope before mounting in DEPEX  
931 mounting medium (Electron Microscope Sciences) and drying overnight. Slides were imaged using a 20x  
932 objective with the Axio Scan.Z1 (Zeiss).

933

#### 934 Fluorescent *in situ* hybridization (FISH) of paraffin sections

935 Slide-mounted sections were dewaxed with two, 10 minute changes of HistoClear then rehydrated to 70%  
936 ethanol with a decreasing ethanol series. Slides were incubated in 0.2 M HCl at 37C for 45-60 minutes and  
937 rinsed in DI water before applying 80 µL of hybridization solution (20 mM Tris-HCl pH 8.0, 0.9 M NaCl,  
938 0.01% sodium dodecyl sulphate, 30% formamide) containing 100 pmol/µL of an *E. muscae* Berkeley-  
939 specific DNA probe (AlexaFluor633-5'-TGCTAAAACAGCACAGTT-3', ThermoFisher Scientific).  
940 Slides were incubated overnight in a humid chamber at room temperature. The following day, slides were  
941 briefly washed in 1x PBS with 0.3% Triton-X100, rinsed in 1x PBS and mounted in ProLong Gold with  
942 DAPI (ThermoFisher Scientific). Slides were cured for 24 hours before imaging on a LSM 800 confocal  
943 microscope (Zeiss) with 5x-40x air objectives.

944 **Supporting Information**

945

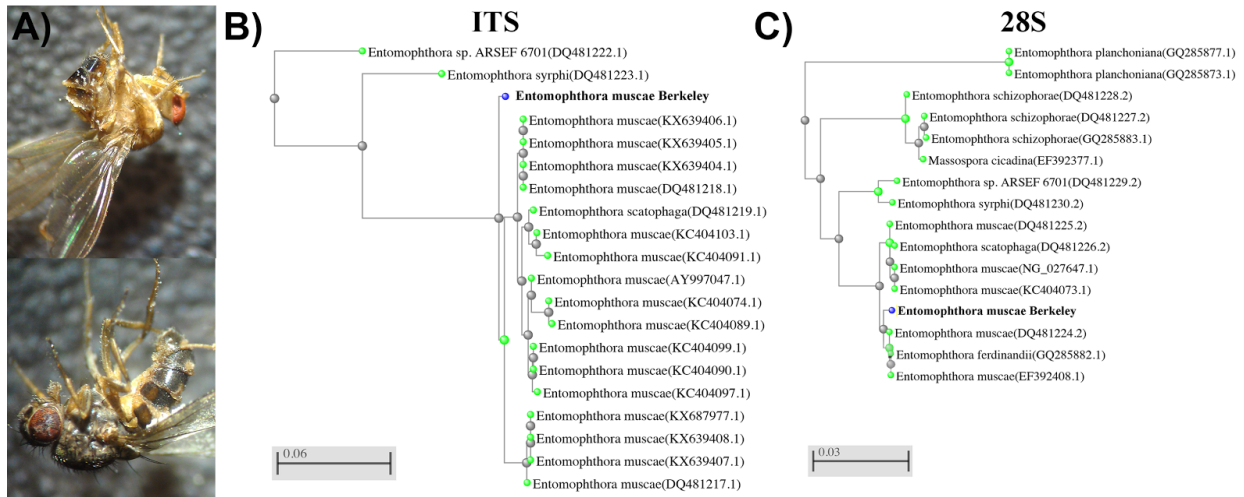

946

947 **Figure S1. Discovery of *E. muscae Berkeley*.** A) *E. muscae Berkeley*-killed cadavers discovered in bait on  
948 July 25, 2015. Note remnants of fungal growth through the intersegmental membrane of dorsal abdomen  
949 (above and below) and spores deposited on wings (above and below) and legs (below). B,C) BLAST  
950 (blastn) results as trees (fast minimum evolution) for B) consensus *E. muscae Berkeley* ITS (13 sequences)  
951 and C) *E. muscae Berkeley* 28S (11 sequences). Gray legend bars show difference in percent identity  
952 between sequences.

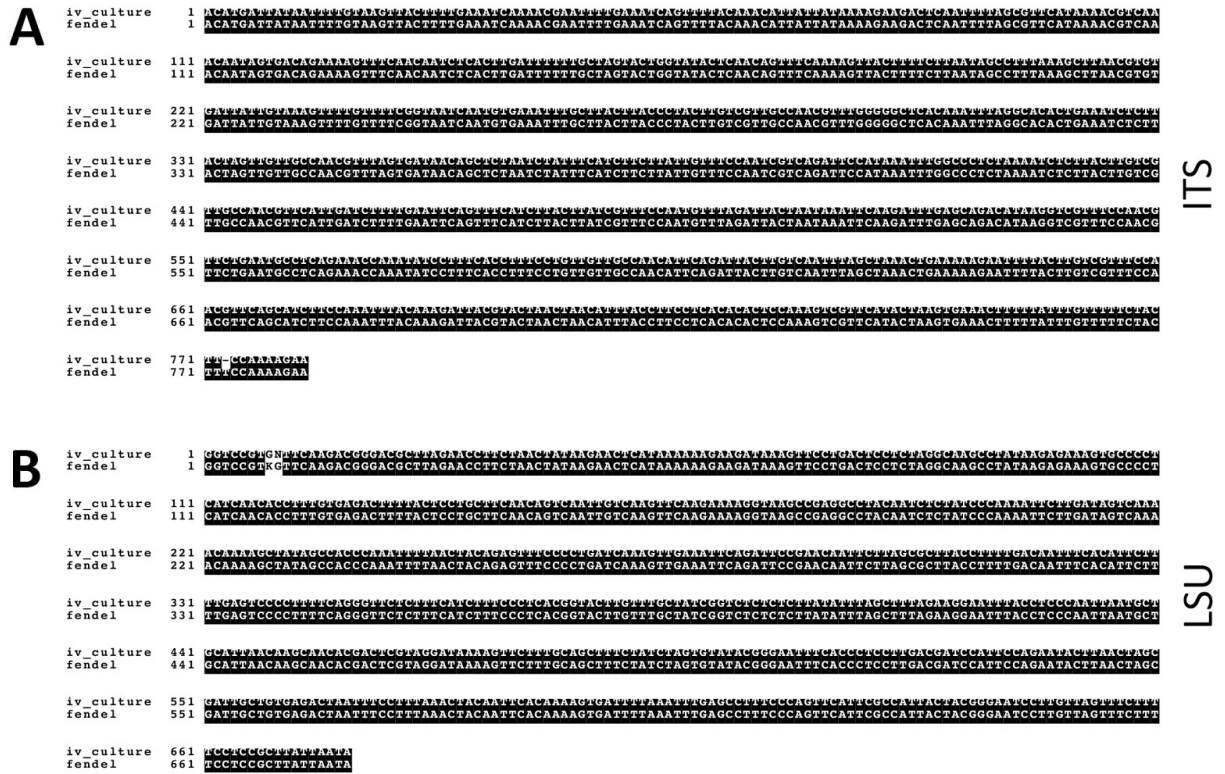

953

954 **Figure S2. Confirmation that *E. muscae* Berkeley is growing *in vitro*.** A) Alignment of ITS region from  
 955 *in vitro* culture (iv\_culture) and consensus ITS sequence from fendel cadavers (fendel). B) Same as A, but  
 956 for LSU region.

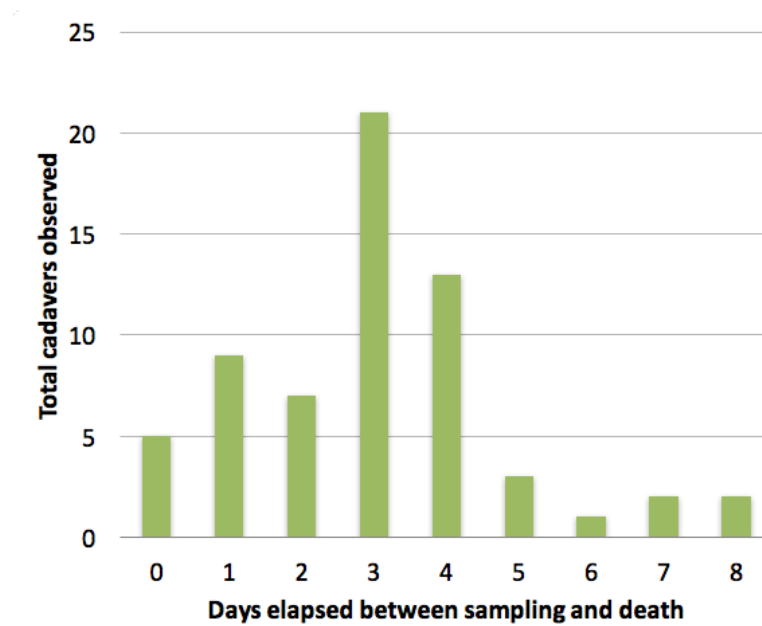

957

958 **Figure S3. Time between capture of wild *Drosophila* and death by *E. muscae* infection when housed**  
959 **on Koshland diet.** Flies were housed at ambient temperature and humidity in a second-story apartment  
960 during August and September 2015 in Berkeley, CA. A total of 63 cadavers of wild *Drosophila* were  
961 observed out of approximately 900 flies aspirated and monitored during this time.

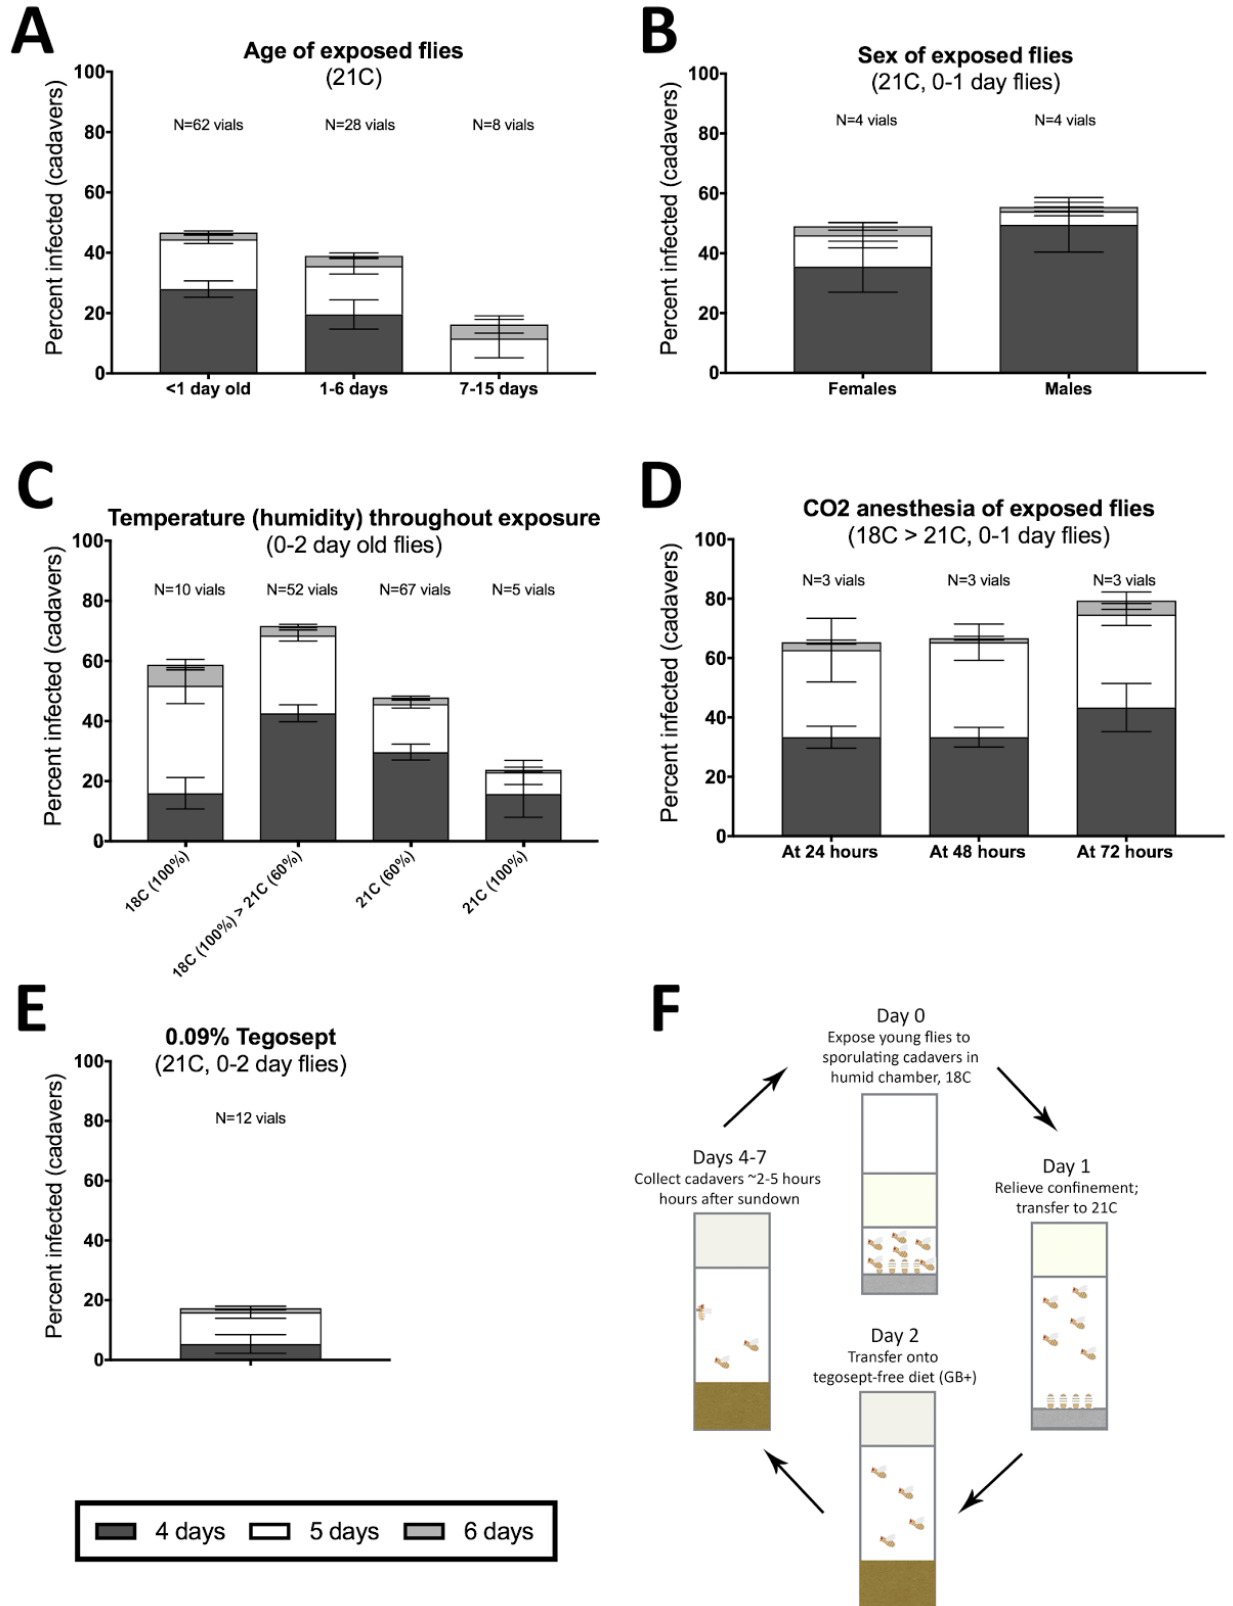

963 **Figure S4. Optimization of *in vivo* *E. muscae* infection of CantonS WF *D. melanogaster* under**  
964 **laboratory conditions.** A-E) Percentage of infected cadavers at 96 hours (4 days), 120 hours (5 days) or  
965 144 hours (6 days) after exposure to *E. muscae* Berkeley upon varying A) age; B) sex; C) temperature and  
966 humidity; D) CO<sub>2</sub> anesthesia for 20 minutes at the indicated post-exposure time or E) housing on 0.09%  
967 tegosept for 120 hours beginning 48 hours after exposure. 18C > 21C indicates that vials were incubated  
968 24 hours at 18C, 100% humidity then transferred to 21C, ~60% humidity. If no percent is indicated, then  
969 humidity was ~60%. All vials used 4-6 cadavers to establish infection and were set up using the anesthesia-  
970 independent protocol. Replicate vials for each condition are shown above the graph. For all panels each vial  
971 contained 50 flies. F) Summary of method for *in vivo* propagation of *E. muscae* in CantonS WF *D.*  
972 *melanogaster*. Briefly, 50 healthy, young (eclosed within the last 24 hours) CantonS flies of mixed sex are  
973 confined within 2 cm of a circle of 6 cadavers embedded head-first in sucrose agar. Vials are incubated 24  
974 hours at 18C and ~100% humidity. On Day 1 (24 hours since exposure) the vial plugs are raised to the top  
975 of the vial and incubation continues for the next 24 hours at 21C with ~60% humidity. On Day 2 (48 hours  
976 since exposure), flies are moved away from cadavers and onto GB+ diet. From Days 3-7 (96 to 168 hours  
977 since exposure), vials are monitored 2-5 hours following “sundown” to collect fresh cadavers. These  
978 cadavers are then used to begin new vials (Day 0).



979 <https://youtu.be/111Wks5wYCs>

980 **Movie S1. *E. muscae* Berkeley-infected CantonS fly undergoing end-of-life proboscis extension.** Video  
981 recorded through the eyepiece of a dissecting microscope on a Nexus 5x phone (Google). Capture and  
982 playback are in real time.

983

984 <https://youtu.be/IiqJcpfBAGQ>

985 **Movie S2. *E. muscae* Berkeley-infected CantonS fly undergoing end-of-life wing raising, viewed from**  
986 **the side.** Video was captured with a Nexus 5x phone (Google) and macro lens (Luxsure). Capture and  
987 playback are in real time.

988

989 <https://youtu.be/DdR-iSdYG6A>

990 **Movie S3. *E. muscae* Berkeley-infected CantonS fly undergoing end-of-life wing raising, viewed head-**  
991 **on.** Video was captured with a Nexus 5x phone (Google) and macro lens (Luxsure). Capture and playback  
992 are in real time.

993

994 <https://youtu.be/qDCZJmhWkbU>

995 **Movie S4. Animated time lapse of *E. muscae* Berkeley-infected CantonS cadavers undergoing spore**  
996 **production and ejection.** Sporulation time lapse in *E. muscae Berkeley* killed cadavers. Time listed at the  
997 top right corner of each frame is the time that has elapsed since the light-dark transition. One image was  
998 taken every minute for ~24 hours with three cadavers situated on a cotton flug at ambient temperature and  
999 humidity. Images are played back at 10 fps.

1000

1001 <https://youtu.be/T5Pi0JoEm0I>

1002 **Movie S5. A primary conidium is ejected from a conidiophore formed in an *E. muscae* Berkeley-**  
1003 **killed cadaver.** Arrowheads indicates conidium that launches and the vacant conidiophore that remains  
1004 after launch. Video was captured at 54,000 frames per second (fps) at 5x magnification; frames are played  
1005 back at 5 fps. Scale bar is 25  $\mu\text{m}$ .

1006

1007 <https://youtu.be/B3BHDwvazgg>

1008 **Movie S6. A primary conidium lands on the lid of a polystyrene petri dish.** The conidium lands as one  
1009 complete unit, supporting the fungal cannon mechanism of primary conidium ejection in *E. muscae*. Video  
1010 was captured at 18,000 fps at 5x magnification; frames are played back at 5 fps. Scale bar is 25  $\mu\text{m}$ .

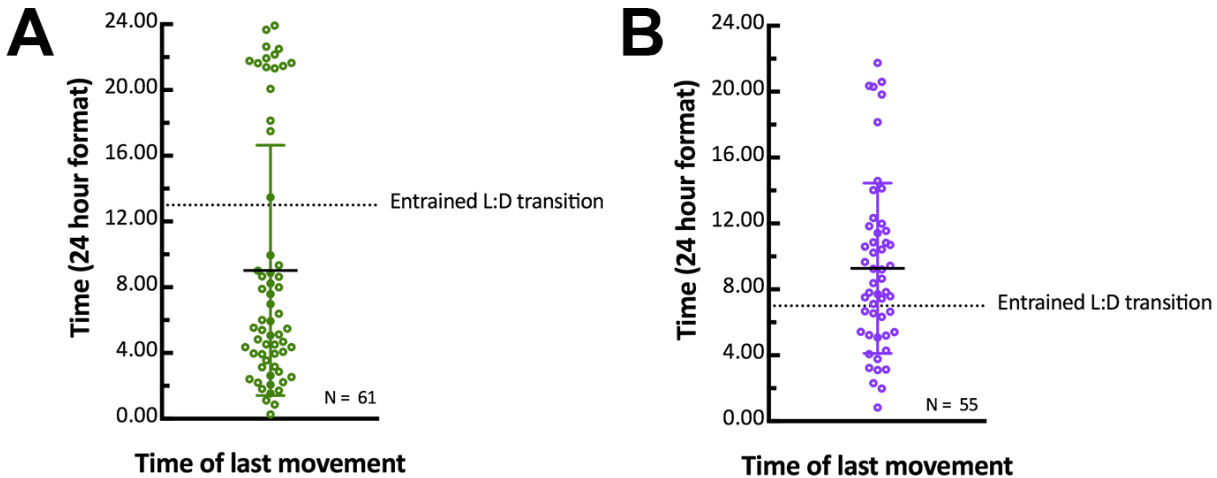

1011

1012 **Figure S5. *E. muscae Berkeley*-infected CantonS flies housed in constant darkness do not consistently**

1013 **die in a gated fashion.** Each circle represents the time of last movement observed for one cadaver as

1014 detected by the DAM. Flies were raised on the indicated 12:12 light:dark cycle then exposed to *E. muscae*

1015 *Berkeley* as per standardized protocol. Dotted line indicates the expected light-dark transition based on the

1016 entrained light cycle. A) Flies entrained on a 12:12 light:dark cycle with photophase beginning at 1 am and

1017 scotophase beginning at 1 pm. B) Flies entrained on a 12:12 light:dark cycle with photophase beginning at

1018 7 pm and scotophase beginning at 7 am.

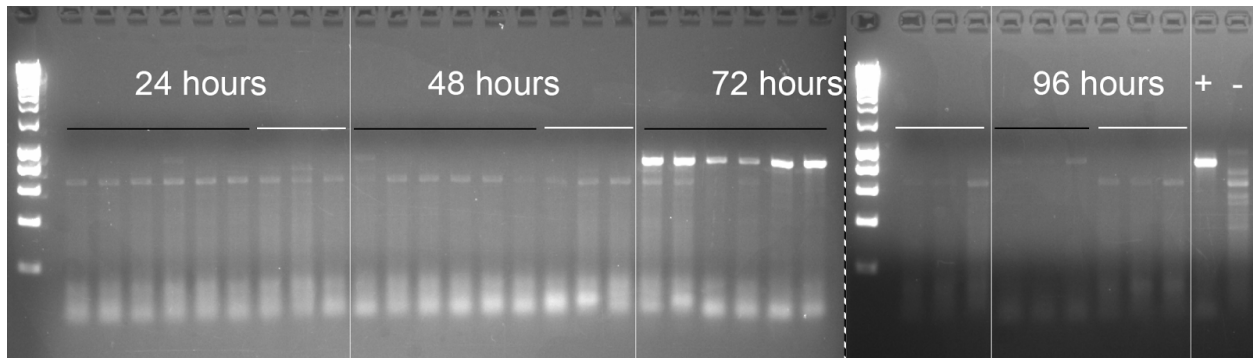

1019  
1020 **Figure S6. Reverse-transcription PCR of *E. muscae* Berkeley ITS sequence in exposed and control**  
1021 **flies.** All samples were run on the same gel with equal loading volumes; samples to the right of the dashed  
1022 line were run on the lower half of the same gel containing samples to the left of dotted line (see methods  
1023 for sample generation). DNA ladder (5  $\mu$ L Hyperladder 1 kb, Biorline) was run in the first lane of each gel  
1024 half. Samples are shown in chronological order, with the time point indicated above the left-most sample.  
1025 Black lines indicated exposed flies; white lines indicate unexposed flies. Exposed flies collected at 96 hours  
1026 were cadavers that had died of *E. muscae* Berkeley infection. Plus (+) indicates positive control (*E. muscae*  
1027 Berkeley *in vitro* RNA template); minus (-) indicates additional negative control (*D. melanogaster* RNA  
1028 from earlier experiment, before the discovery and introduction of *E. muscae* Berkeley to the laboratory).

1029  
1030 <https://youtu.be/GeTRUiBIW8s>

1031 **Movie S7. Formation of primary conidia atop conidiophores.** The intersegmental membranes of a fresh  
1032 *E. muscae* Berkeley-killed cadaver were imaged at 20x magnification every minute for 222 minutes  
1033 beginning 4 hours and 10 minutes after sunset. The time lapse is played back at 10 fps. Scale bar is 50  $\mu$ m.

1034  
1035 <https://youtu.be/1vrXbDWHQCw>

1036 **Movie S8. Formation of secondary conidia from off-target primaries.** The wing of an *E. muscae*  
1037 Berkeley-killed cadaver was imaged at 20x magnification every minute for 361 minutes beginning 10 hours  
1038 and 30 minutes after the light-dark transition. The time lapse is played back at 10 fps. Scale bar is 100  $\mu$ m.

1039  
1040 **Table S1. GO term enrichments of host gene groups as given in Figure 4C.** Panther GO-term analysis  
1041 (complete biological process) for genes in Groups i-vi (Figure 4C).

1042 ➤ See file Table\_S1.pdf

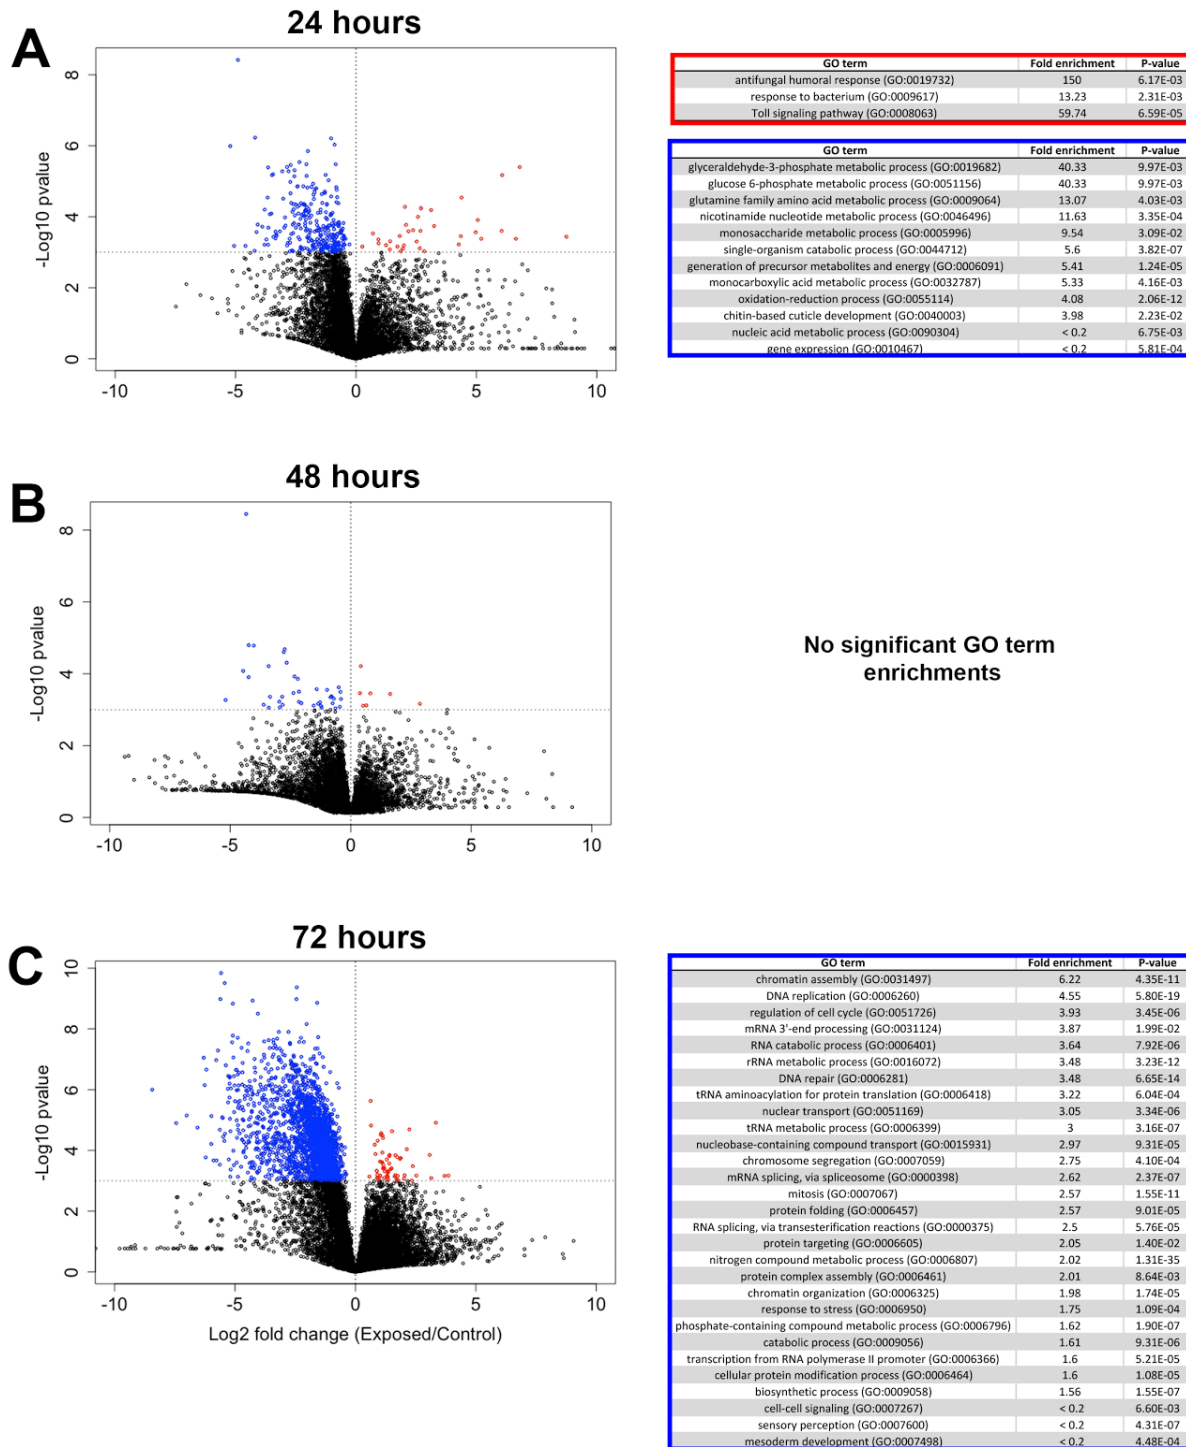

1043

1044 **Figure S7. Genes exhibiting differential expression between flies after mock exposure or exposure to**

1045 ***E. muscae* at 24, 48 or 72 hours. A) Left: Volcano plot for all genes at 24 hours. P-value is determined by**

1046 **ANOVA grouping control vs. exposed samples. Genes with p-value < 0.001 are shown in color. Right:**

1047 **Panther GO-term analysis (complete biological process) of genes overexpressed in exposed animals (red)**

1048 or control animals (blue). B) Left: Volcano plot for all genes at 48 hours. P-value is determined by ANOVA  
1049 grouping control vs. exposed samples. Genes with p-value under 0.001 are shown in color. Right: No  
1050 significant GO term enrichments were found for differentially-expressed genes. C) Left: Volcano plot for  
1051 all genes at 72 hours. P-value is determined by ANOVA grouping control vs. exposed samples. Genes with  
1052 p-value under 0.001 are shown in color. Right: Panther GO-term analysis (complete biological process) of  
1053 genes overexpressed in control animals (blue). There are no significant GO term enrichments for set of  
1054 genes overexpressed in exposed samples.

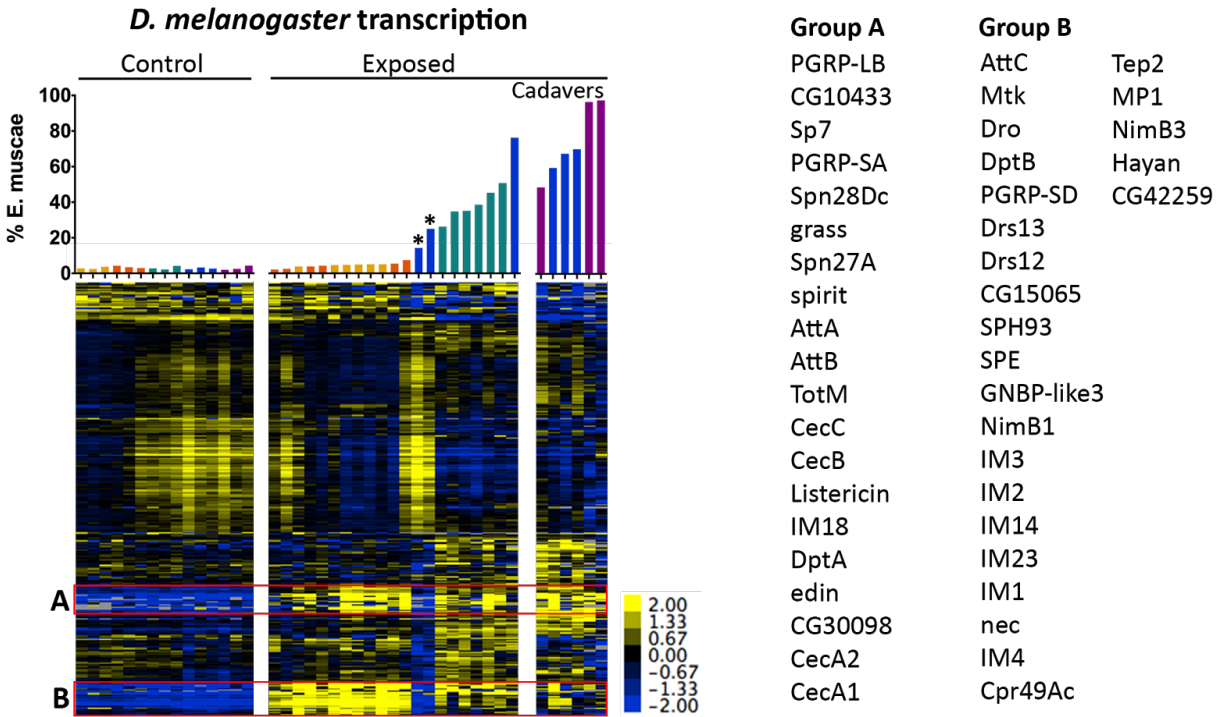

1055

1056

1057

1058

1059

1060

1061

1062

1063

**Figure S8. Expression of immune genes over the course of infection of *D. melanogaster* by *E. muscae* Berkeley.** Complete linkage hierarchical gene clustering by gene was performed in Gene Cluster 3.0 on all genes annotated with defense response (GO 0006952) after filtering out across all genes that are expressed at least at two TPM in at least three out of 42 samples (10,875 transcripts total), then log transforming and centering on the mean value for each transcript. Samples are ordered by percentage of *E. muscae* Berkeley reads as a fraction of the total reads aligned (above). The scale bar for the heatmap is given to the right of the plot. Two 96 hour exposed samples that show an aberrant immune response compared to all other exposed samples are indicated by asterisks.

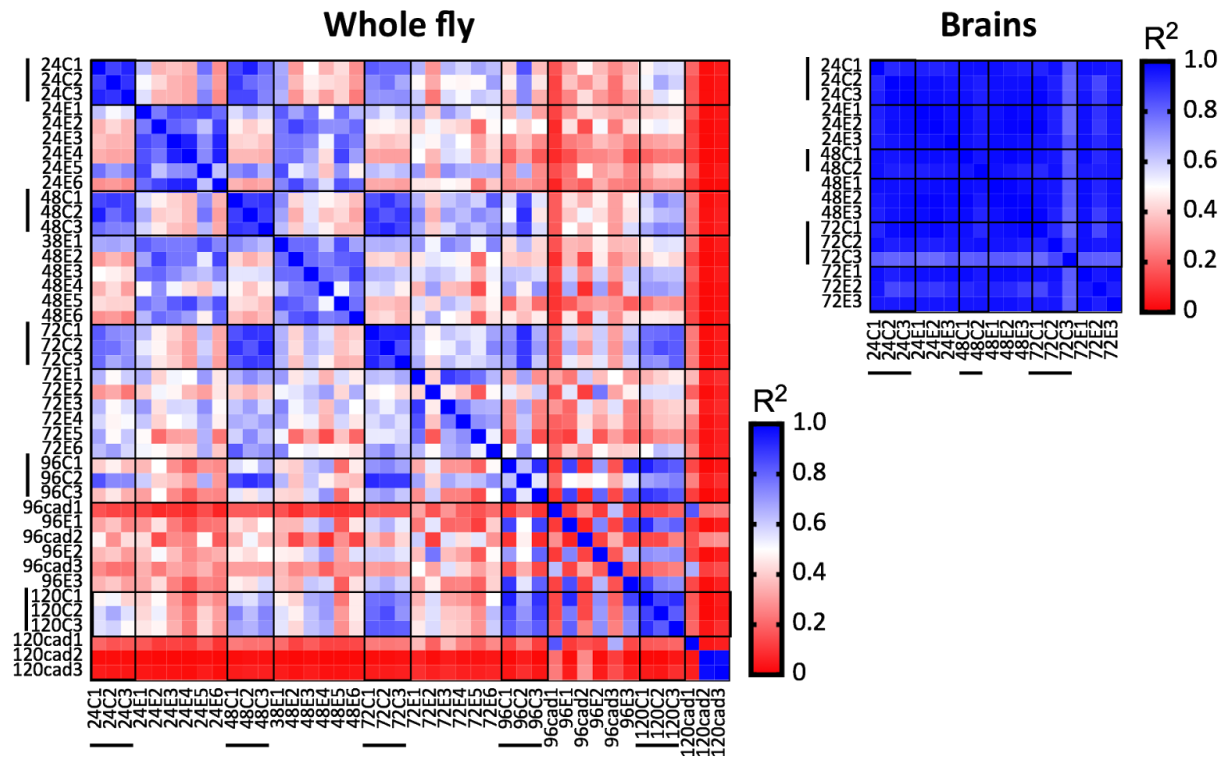

1064

1065 **Figure S9. Host gene expression in the brain is stable over the first 72 hours of *E. muscae Berkeley***  
1066 **infection.** Right) All pairwise linear correlations between samples from *E. muscae Berkeley*-infected whole  
1067 fly RNAseq time course. Left) All pairwise linear correlations between samples from *E. muscae Berkeley*-  
1068 infected dissected brain pilot RNAseq time course. Samples are named in the following format:  
1069 HourTypeReplicate, with “C” indicating controls, “E” indicating exposed flies living at the time sampled  
1070 and “cad” indicates that the fly had been killed by *E. muscae Berkeley* before sampling. For example,  
1071 “24C1” indicates a the first replicate control sample (uninfected fly) taken at 24 hours after mock exposure.  
1072 Black rectangles outline rows and columns containing correlation values for control samples. Control  
1073 samples are denoted on each axis with a black bar.

1074 **References**

1075. Hughes DP, Andersen SB, Hywel-Jones NL, Himaman W, Billen J, Boomsma JJ. Behavioral  
1076 mechanisms and morphological symptoms of zombie ants dying from fungal infection. BMC Ecol.  
1077 2011;11: 13.
1078. Vyas A, Kim S-K, Giacomini N, Boothroyd JC, Sapolsky RM. Behavioral changes induced by  
1079 *Toxoplasma* infection of rodents are highly specific to aversion of cat odors. Proc Natl Acad Sci.  
1080 2007;104: 6442–6447.
1081. Spatafora JW, Chang Y, Benny GL, Lazarus K, Smith ME, Berbee ML, et al. A phylum-level  
1082 phylogenetic classification of zygomycete fungi based on genome-scale data. Mycologia. 2016;108:  
1083 1028–1046.
1084. Cohn F. *Empusa muscae* und die krankheit der Stubenfliegen. Ein Beitrag zur Lehre von den durch  
1085 parasitische Pilze charakterisierten Epidemien. Nova acta Academiae Caesareae Leopoldino-Carolinae  
1086 Germanicae Naturae Curiosorum. 1855;25: 299–360.
1087. Keller S. *Entomophthora muscae* als Artenkomplex. Mitteilungen der Schweizerischen Entomologischen  
1088 Gesellschaft. agris.fao.org; 1984;57: 131–132.
1089. MacLeod DM, Müller-Kögler E, Wilding N. *Entomophthora* species with *E. muscae*-like conidia.  
1090 Mycologia. JSTOR; 1976;68: 1–29.
1091. Roy HE, Steinkraus DC, Eilenberg J, Hajek AE, Pell JK. Bizarre Interactions and Endgames:  
1092 Entomopathogenic Fungi and Their Arthropod Hosts. Annu Rev Entomol. 2006;51: 331–357.
1093. Balazy S. On Rhizoids of *Entomophthora-muscae* (Cohn) Fresenius (Entomophthorales,  
1094 Entomophthoraceae). Mycotaxon. 1984;19: 397–407.
1095. Krasnoff SB, Watson DW, Gibson DM, Kwan EC. Behavioral effects of the entomopathogenic fungus,  
1096 *Entomophthora muscae* on its host *Musca domestica*: Postural changes in dying hosts and gated pattern of  
1097 mortality. J Insect Physiol. Elsevier; 1995;41: 895–903.
1098. Brobyn PJ, Wilding N. Invasive and developmental processes of *Entomophthora muscae* infecting  
1099 houseflies (*Musca domestica*). Trans Br Mycol Soc. Elsevier; 1983;80: 1–8.



11001. Mullens BA, Rodriguez JL. Dynamics of *Entomophthora muscae* (Entomophthorales:  
1101 Entomophthoraceae) Conidial Discharge from *Musca domestica* (Diptera: Muscidae) Cadavers. Environ  
1102 Entomol. [ee.oxfordjournals.org](http://ee.oxfordjournals.org); 1985;14: 317–322.
11032. Mullens, B A Rodriguez, J L Meyer, J A. An Epizootiological Study of *Entomophthora muscae* in  
1104 Muscoid Fly Populations on Southern California Poultry Facilities, with Emphasis on *Musca domestica*.  
1105 *Hilgardia*. 1987;55.
11063. Charnley AK. Physiological aspects of destructive pathogenesis in insects by fungi: a speculative review.  
1107 In: J M Anderson Adm Rayner, editor. Invertebrate-microbial interactions: Joint symposium of the British  
1108 Mycological Society and the British Ecological Society held at the University of Exeter 1982. 1984. pp.  
1109 229–270.
11104. Watson DW, Petersen JJ. Sexual Activity of Male *Musca domestica* (Diptera: Muscidae) Infected with  
1111 *Entomophthora muscae* (Entomophthoraceae: Entomophthorales). *Biol Control*. Elsevier; 1993;3: 22–26.
11125. Steinkraus DC, Kramer JP. Susceptibility of sixteen species of Diptera to the fungal pathogen  
1113 *Entomophthora muscae* (Zygomycetes: Entomophthoraceae). *Mycopathologia*. 1987;100: 55–63.
11146. Kramer JP, Steinkraus DC. Culture of *Entomophthora muscae* in vivo and its infectivity for six species of  
1115 muscoid flies. *Mycopathologia*. Springer Netherlands; 1981;76: 139–143.
11167. Keller S. Arthropod-pathogenic Entomophthorales: Biology, Ecology, Identification. 2007.
11178. Elya C, Zhang V, Ludington WB, Eisen MB. Stable Host Gene Expression in the Gut of Adult  
1118 *Drosophila melanogaster* with Different Bacterial Mono-Associations. *PLoS One*. Public Library of  
1119 Science; 2016;11: e0167357.
11209. Turian G, Wuest J. MYCOSES CAUSED BY ENTOMOPHTHORACEAE AFFECTING  
1121 POPULATIONS OF ANTS AND DROSOPHILA. *Mitteilungen der Schweizerischen Entomologischen*  
1122 *Gesellschaft*. 1969;42: 197–201.
11230. Goldstein B. An Empusa Disease of *Drosophila*. *Mycologia*. Mycological Society of America; 1927;19:  
1124 97–109.
11251. Keller S. The genus *Entomophthora* (Zygomycetes, Entomophthorales) with a description of five new  
1126 species. *SYDOWIA-HORN-*. VERLAG FERDINAND BERGER; 2002;54: 157–197.

11222. Liu H, Beckenbach AT. Evolution of the mitochondrial cytochrome oxidase II gene among 10 orders of  
1128 insects. *Mol Phylogenet Evol.* 1992;1: 41–52.
11293. Hajek AE, Papierok B, Eilenberg J. Chapter IX - Methods for study of the Entomophthorales. In: Lacey  
1130 LA, editor. *Manual of Techniques in Invertebrate Pathology (Second Edition)*. San Diego: Academic  
1131 Press; 2012. pp. 285–316.
11324. Kalsbeek V, Pell JK, Steenberg T. Sporulation by *Entomophthora schizophorae* (Zygomycetes:  
1133 Entomophthorales) from housefly cadavers and the persistence of primary conidia at constant  
1134 temperatures and relative humidities. *J Invertebr Pathol.* Elsevier; 2001;77: 149–157.
11355. Yafetto L, Carroll L, Cui Y, Davis DJ, Fischer MWF, Henterly AC, et al. The fastest flights in nature:  
1136 high-speed spore discharge mechanisms among fungi. *PLoS One.* 2008;3: e3237.
11376. Humber RA. An alternative view of certain taxonomic criteria used in the Entomophthorales  
1138 (Zygomycetes) [Fungi, insect pathogens]. *Mycotaxon.* apr-jun1981;13. Available:  
1139 <http://agris.fao.org/agris-search/search.do?recordID=US8112089>
11407. Becher PG, Jensen RE, Natsopoulou ME, Verschut V, De Fine Licht HH. Infection of *Drosophila suzukii*  
1141 with the obligate insect-pathogenic fungus *Entomophthora muscae*. *J Pest Sci.* Springer Berlin  
1142 Heidelberg; 2017; 1–7.
11438. Keller S, Kalsbeek V, Eilenberg J. Redescription of *Entomophthora muscae* (Cohn) Fresenius. *Sydowia.*  
1144 1999;51: 197–209.
11459. Boomsma JJ, Jensen AB, Meyling NV, Eilenberg J. Evolutionary interaction networks of insect  
1146 pathogenic fungi. *Annu Rev Entomol.* 2014;59: 467–485.
11470. De Fine Licht HH, Jensen AB, Eilenberg J. Comparative transcriptomics reveal host-specific nucleotide  
1148 variation in entomophthoralean fungi. *Mol Ecol.* 2017;26: 2092–2110.
11491. Butt TM, Hajek AE, Humber RA. Gypsy Moth Immune Defenses in Response to Hyphal Bodies and  
1150 Natural Protoplasts of Entomophthoralean Fungi. *J Invertebr Pathol.* 1996;68: 278–285.
11512. Beauvais A, Latge J-P, Vey A. The Role of Surface Components of the Entomopathogenic Fungus  
1152 *Entomophaga aulicae* in the Cellular Immune Response of *Galleria mellonella* (Lepidoptera). *J Gen*  
1153 *Microbiol.* 1989;135: 489–498.

11543. Valanne S, Wang J-H, Rämetsä M. The Drosophila Toll signaling pathway. *J Immunol.* 2011;186: 649–  
1155 656.
11564. Levitin A, Whiteway M. Drosophila innate immunity and response to fungal infections. *Cell Microbiol.*  
1157 2008;10: 1021–1026.
11585. Fredericksen MA, Zhang Y, Hazen ML, Loreto RG, Mangold CA, Chen DZ, et al. Three-dimensional  
1159 visualization and a deep-learning model reveal complex fungal parasite networks in behaviorally  
1160 manipulated ants. *Proc Natl Acad Sci U S A.* 2017; doi:10.1073/pnas.1711673114
11636. Humber RA. The systematics of the genus *Strongwellsea* (Zygomycetes: Entomophthorales). *Mycologia.*  
1162 1976;68: 1042–1060.
11637. Grabherr MG, Haas BJ, Yassour M, Levin JZ, Thompson DA, Amit I, et al. Full-length transcriptome  
1164 assembly from RNA-Seq data without a reference genome. *Nat Biotechnol.* 2011;29: 644–652.
11658. Bray NL, Pimentel H, Melsted P, Pachter L. Near-optimal probabilistic RNA-seq quantification. *Nat*  
1166 *Biotechnol.* 2016;34: 525–527.
11679. Mi H, Poudel S, Muruganujan A, Casagrande JT, Thomas PD. PANTHER version 10: expanded protein  
1168 families and functions, and analysis tools. *Nucleic Acids Res.* 2016;44: D336–42.
11690. Ruzin SE. *Plant Microtechnique and Microscopy.* Oxford University Press; 1999.
